# Supplementary material
Source: Royal Society of Chemistry journal article supplement (doi:10.1039/d6cy00356g)

## Supporting Information

### Mixed Valence Cu(I)/Cu(II)-MWCNT as Heterogeneous Catalyst for [Click-Carbene Insertion]-Cascade Reaction

Samrat Charaimuria, Prodeep Phukan\*

*Department of Chemistry, Gauhati University, Guwahati – 781014, Assam, India*

E-mail: [pphukan@gauhati.ac.in](mailto:pphukan@gauhati.ac.in)

#### Table of Contents

|     |                                                                                       |         |
|-----|---------------------------------------------------------------------------------------|---------|
| 1.  | General information                                                                   | S2      |
| 2.  | Experimental procedures and characterization details                                  | S2      |
| 2.1 | General procedure for the synthesis of <i>N</i> -substituted 1,2,3-triazole compounds | S2-S3   |
| 2.2 | Figure S1: EDX Spectra of catalyst synthesis                                          | S3      |
| 2.3 | Table S1: Table of elemental composition of catalyst synthesis                        | S4      |
| 2.4 | Figure S2: P-XRD pattern of reused catalyst                                           | S5      |
| 3.  | Spectroscopic data                                                                    | S6-S9   |
| 4.  | References                                                                            | S10     |
| 5.  | <sup>1</sup> H and <sup>13</sup> C NMR spectra                                        | S11-S25 |
| 6.  | HRMS spectra                                                                          | S26-27  |

## 1. General information:

The reagents were obtained from commercial suppliers and used without further purification. Commercially available terminal alkynes, ethyl diazoacetate, and TMSN<sub>3</sub> were directly employed without any previous purification technique (distillation/use of molecular sieves). FT-IR spectra were recorded using Affinity-1 SHIMADZU. Powder X-ray diffraction (XRD) was recorded using a Rigaku X-ray diffractometer with Cu-K $\alpha$  radiation at a wavelength of 1.5418 Å. FESEM and EDX analyses were recorded using a ZEISS sigma 300 scanning along with energy dispersive X-ray spectrometer (EDX). TEM analysis was performed using a JEOL JEM-2100 electron microscope. Thermogravimetric analysis (TGA) was performed on a Mettler Toledo TGA/DTA 1, STAR system analyzer. X-Ray Photoelectron Spectroscopy (XPS) data was determined using PHI 5000 VersaProbe III. Brunauer-Emmett-Teller (BET) data was recorded using BET Surface Area Analyser Model SAA-2000. Inductively coupled plasma-optical emission spectrometry (ICP-OES) was carried out on the Thermo Scientific iCAP 7600 instrument. <sup>1</sup>H and <sup>13</sup>C spectra were recorded on a Bruker Ultrashield 400 MHz spectrometer. Chemical shift is given in units ( $\delta$ ) relative to tetramethylsilane (TMS) signal as an internal reference in CDCl<sub>3</sub>. <sup>1</sup>H NMR coupling constants were reported in Hz and multiplicity was indicated as follows: s (singlet); d (doublet); t (triplet); q (quartet); m (multiplet); br (broad); dd (doublet of doublets). Chromatographic purification was performed using column chromatography over a manually packed column containing silica gel (230-400 mesh). Melting points were measured in Relitech melting point apparatus. The NMR spectra for all the prepared compounds are included in the following sections of this supporting information.

## 2. Experimental procedures and characterization details:

### 2.1 General procedure for the synthesis of N-substituted 1,2,3-triazoles

To a stirred mixture of the prepared catalyst (25wt%), terminal alkynes **1** (0.2 mmol), ethyl diazoacetate **2** (0.4 mmol), TMSN<sub>3</sub> **3** (0.4 mmol) were added in acetonitrile solvent (2 ml) in the presence of K<sub>2</sub>CO<sub>3</sub> (2 equiv) and then stirred at 85 °C for 3 hours. After the completion of the reaction, the mixture was cooled to room temperature. The catalyst was recovered using centrifugation technique and washed with ethyl acetate several times to wash out the remained traces of the reaction mixture and then dried in oven for 6 hours at 60 °C for reusing purpose. The organic parts in the reaction mixture were further

separated out by adding ethyl acetate. The combined organic layer was dried over  $\text{Na}_2\text{SO}_4$  and concentrated in vacuo. The crude residue was then purified by column chromatography on silica gel (ethyl acetate:petroleum ether, 3:7) to afford the desired product.

## 2.2 EDX spectra:

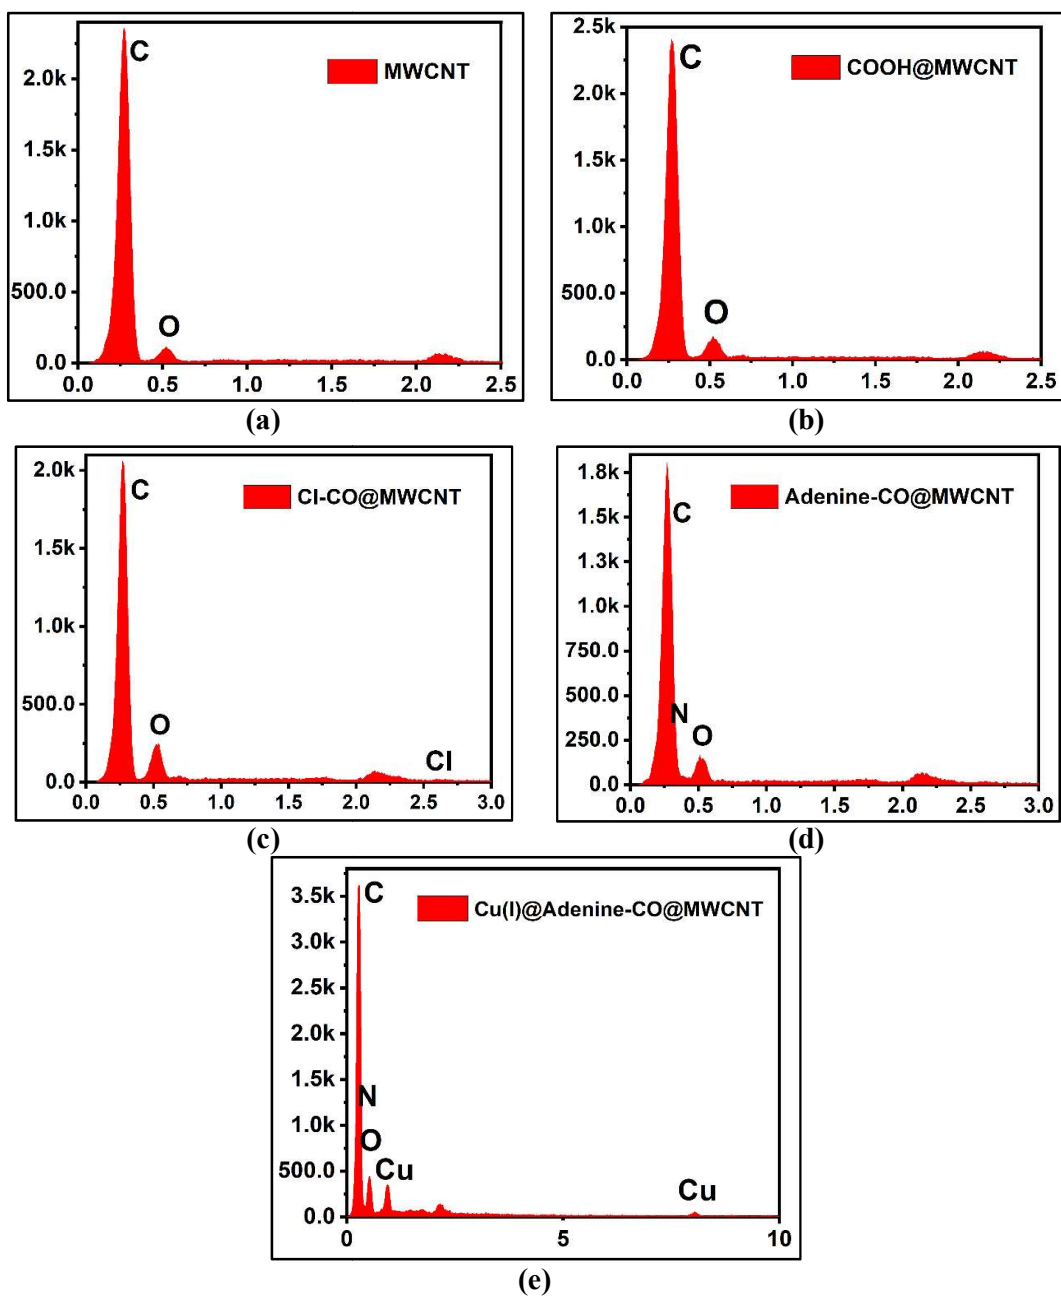

**Figure S1.** EDX spectra of (a) MWCNT, (b) COOH@MWCNT, (c) Cl-CO@MWCNT, (d) Adenine-CO@MWCNT, (e) Cu@Adenine-CO@MWCNT.

## 2.3 Table of Elemental composition

| <b>Table S1. (a) Elemental composition of MWCNT</b> |                 |                 |
|-----------------------------------------------------|-----------------|-----------------|
| <b>Element</b>                                      | <b>Weight %</b> | <b>Atomic %</b> |
| <b>C K</b>                                          | 83.51           | 87.09           |
| <b>O K</b>                                          | 16.49           | 12.91           |

| <b>Table S1. (b) Elemental composition of COOH@MWCNT</b> |                 |                 |
|----------------------------------------------------------|-----------------|-----------------|
| <b>Element</b>                                           | <b>Weight %</b> | <b>Atomic %</b> |
| <b>C K</b>                                               | 80.55           | 84.66           |
| <b>O K</b>                                               | 19.45           | 15.34           |

| <b>Table S1. (c) Elemental composition of Cl-CO@MWCNT</b> |                 |                 |
|-----------------------------------------------------------|-----------------|-----------------|
| <b>Element</b>                                            | <b>Weight %</b> | <b>Atomic %</b> |
| <b>C K</b>                                                | 78.29           | 82.96           |
| <b>O K</b>                                                | 21.19           | 16.86           |
| <b>Cl K</b>                                               | 0.52            | 0.19            |

| <b>Table S1. (d) Elemental composition of Adenine-CO@MWCNT</b> |                |                 |
|----------------------------------------------------------------|----------------|-----------------|
| <b>Element</b>                                                 | <b>Weight%</b> | <b>Atomic %</b> |
| <b>C K</b>                                                     | 62.46          | 67.27           |
| <b>N K</b>                                                     | 20.73          | 19.14           |
| <b>O K</b>                                                     | 16.81          | 13.59           |

| <b>Table S1. (e) Elemental composition of Cu@Adenine-CO@MWCNT</b> |                 |                 |
|-------------------------------------------------------------------|-----------------|-----------------|
| <b>Element</b>                                                    | <b>Weight %</b> | <b>Atomic %</b> |
| <b>C K</b>                                                        | 63.01           | 72.16           |
| <b>N K</b>                                                        | 13.95           | 13.70           |
| <b>O K</b>                                                        | 14.24           | 12.24           |
| <b>Cu K</b>                                                       | 8.80            | 1.91            |

The raw data for all the characterizations such as FT-IR, P-XRD, XPS, EDX, and TGA has been uploaded to zenodo and are available at: <https://doi.org/10.5281/zenodo.19971287>.

**2.4P-XRD pattern of reused catalyst:**

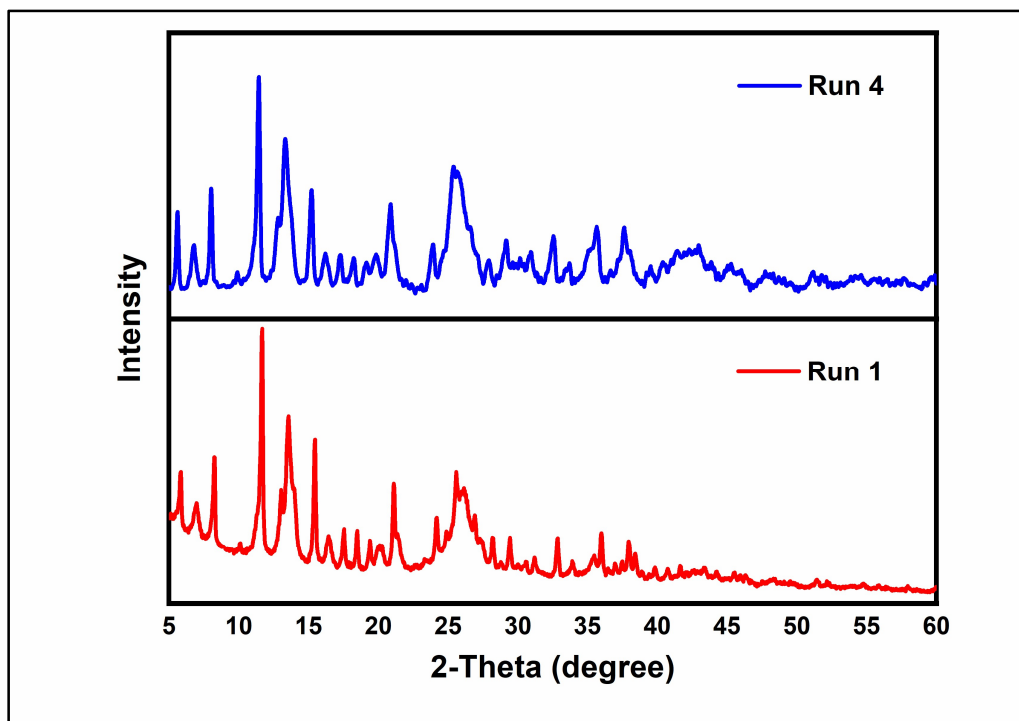

**Figure S2.** P-XRD pattern comparison of reused catalyst up to four runs.

### 3. Spectroscopic data:

1. **Ethyl 2-(4-phenyl-1H-1,2,3-triazol-1-yl)acetate (4a)**: Yellow oil;  $^1\text{H}$  NMR (400 MHz,  $\text{CDCl}_3$ )  $\delta$  (ppm) = 7.92 (s, 1H), 7.85 (d,  $J$  = 6.9 Hz, 2H), 7.44 (t,  $J$  = 7.5 Hz,

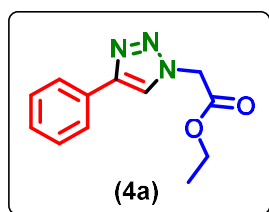

2H), 7.35 (t,  $J$  = 7.4 Hz, 1H), 5.21 (s, 2H), 4.29 (q,  $J$  = 7.1 Hz, 2H), 1.32 (t,  $J$  = 7.2 Hz, 5H);  $^{13}\text{C}$  NMR (100 MHz,  $\text{CDCl}_3$ )  $\delta$  (ppm) = 166.26, 148.28, 130.31, 128.84, 128.29, 125.82, 120.88, 62.49, 50.96, 14.08.

2. **Ethyl 2-(4-(4-(tert-butyl)phenyl)-1H-1,2,3-triazol-1-yl)acetate (4b)**: White solid;  $^1\text{H}$  NMR (400 MHz,  $\text{CDCl}_3$ )  $\delta$  (ppm) = 7.89 (s, 1H), 7.79 (d,  $J$  = 8.3 Hz, 2H), 7.47

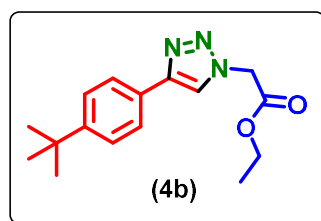

(d,  $J$  = 8.4 Hz, 2H), 5.21 (s, 2H), 4.29 (q,  $J$  = 7.1 Hz, 2H), 1.36 (s, 9H), 1.32 (t,  $J$  = 7.1 Hz, 3H);  $^{13}\text{C}$  NMR (100 MHz,  $\text{CDCl}_3$ )  $\delta$  (ppm) = 166.28, 151.40, 148.27, 127.50, 125.76, 125.55, 120.62, 62.43, 50.95, 34.66, 31.27, 14.06.

3. **Ethyl 2-(4-(p-tolyl)-1H-1,2,3-triazol-1-yl)acetate (4c)**: White solid;  $^1\text{H}$  NMR (400 MHz,  $\text{CDCl}_3$ )  $\delta$  (ppm) = 7.88 (s, 1H), 7.75 (d,  $J$  = 8.1 Hz, 2H), 7.25 (d,  $J$  = 8 Hz,

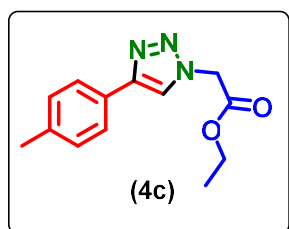

2H), 5.21 (s, 2H), 4.3 (q,  $J$  = 7.1 Hz, 2H), 2.39 (s, 3H), 1.33 (t,  $J$  = 7.1 Hz, 3H);  $^{13}\text{C}$  NMR (100 MHz,  $\text{CDCl}_3$ )  $\delta$  (ppm) = 166.29, 138.15, 132.37, 129.51, 127.52, 125.73, 120.52, 62.45, 50.95, 21.28, 14.07.

4. **Ethyl 2-(4-(4-propylphenyl)-1H-1,2,3-triazol-1-yl)acetate (4d)**: Yellow oil;  $^1\text{H}$

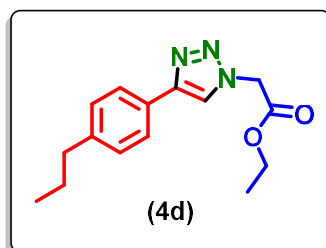

NMR (400 MHz,  $\text{CDCl}_3$ )  $\delta$  (ppm) = 7.88 (s, 1H), 7.76

(d,  $J = 8.1$  Hz, 2H), 7.24 (s, 2H), 5.21 (s, 2H), 4.3 (q,  $J = 7.1$  Hz, 2H), 2.63 (t,  $J = 7.6$  Hz, 2H), 1.70-1.65 (m, 2H), 1.32 (t,  $J = 7.2$  Hz, 3H), 0.96 (t,  $J = 7.3$  Hz, 3H);  $^{13}\text{C}$  NMR (100 MHz,  $\text{CDCl}_3$ )  $\delta$  (ppm) = 166.29, 148.43, 142.99, 128.94, 127.77, 125.74, 120.54, 62.45, 50.97, 37.82, 24.45, 14.07, 13.78.

5. Ethyl 2-(4-(4-(trifluoromethyl)phenyl)-1H-1,2,3-triazol-1-yl)acetate (4e):

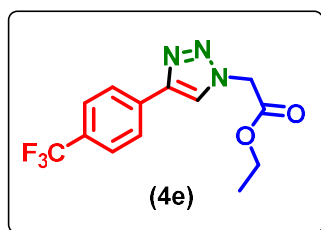

Yellow solid;  $^1\text{H}$  NMR (400 MHz,  $\text{CDCl}_3$ )  $\delta$  (ppm) = 8.00 (d,  $J = 7.8$  Hz, 1H), 7.93 (s, 1H), 7.77 (d,  $J = 7.9$  Hz, 1H), 7.65 (t,  $J = 7.6$  Hz, 1H), 7.53-7.49 (m, 1H), 5.25 (s, 2H), 4.3 (q,  $J = 7.2$

Hz, 2H), 1.31 (t,  $J = 7.2$  Hz, 3H);  $^{13}\text{C}$  NMR (100 MHz,  $\text{CDCl}_3$ )  $\delta$  (ppm) = 166.07, 144.65, 132.03, 131.75, 128.38, 126.09, 124.28, 122.75, 62.52, 51.01, 13.98.

6. Ethyl 2-(4-(thiophen-3-yl)-1H-1,2,3-triazol-1-yl)acetate (4f):

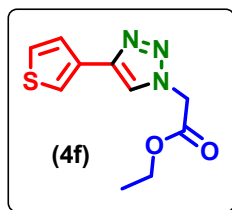

Yellow oil;  $^1\text{H}$  NMR (400 MHz,  $\text{CDCl}_3$ )  $\delta$  (ppm) = 7.82 (s, 1H), 7.71 (dd,  $J = 2.9$  Hz, 1.2 Hz, 1H), 7.47 (dd,  $J = 5$  Hz, 1.1 Hz, 1H), 7.4 (dd,  $J = 5$  Hz, 3 Hz, 1H), 5.2 (s,

2H), 4.29 (q,  $J = 7.1$  Hz, 2H), 1.32 (t,  $J = 7.2$  Hz, 3H);  $^{13}\text{C}$  NMR (100 MHz,  $\text{CDCl}_3$ )  $\delta$  (ppm) = 166.24, 144.43, 131.54, 126.34, 125.82, 121.37, 120.67, 62.47, 50.90, 14.06.

7. Ethyl 2-(4-(4-chlorophenyl)-1H-1,2,3-triazol-1-yl)acetate (4g):

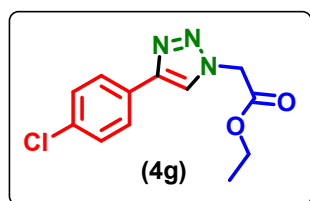

White solid;  $^1\text{H}$  NMR (400 MHz,  $\text{CDCl}_3$ )  $\delta$  (ppm) = 7.91 (s, 1H), 7.79 (d,  $J = 8.6$  Hz, 2H), 7.41 (d,  $J = 8.6$  Hz, 2H), 5.21 (s, 2H), 4.3 (q,  $J = 7.1$  Hz, 2H), 1.33 (t,  $J = 7.1$  Hz, 3H);  $^{13}\text{C}$  NMR (100 MHz,  $\text{CDCl}_3$ )  $\delta$  (ppm) = 166.18, 147.21,

134.04, 129.05, 128.86, 127.04, 120.96, 62.53, 50.95, 14.05.

8. Ethyl 2-(4-(4-bromophenyl)-1H-1,2,3-triazol-1-yl)acetate (4h)

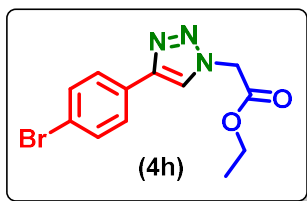

yl)acetate (4h): White solid;  $^1\text{H}$  NMR (400 MHz,  $\text{CDCl}_3$ )  $\delta$  (ppm) = 7.92 (s, 1H), 7.73 (d,  $J$  = 8.5 Hz, 2H), 7.56 (d,  $J$  = 8.5 Hz, 2H), 5.21 (s, 2H), 4.3 (q,  $J$  = 7.1 Hz, 2H), 1.33 (t,  $J$  = 7.2 Hz, 3H);  $^{13}\text{C}$  NMR (100 MHz,  $\text{CDCl}_3$ )  $\delta$  (ppm) = 166.17, 147.24, 131.98, 129.30, 127.31, 122.18, 120.99, 62.54, 50.95, 14.05.

9. Ethyl 2-(4-(3-methoxyphenyl)-1H-1,2,3-triazol-1-yl)acetate (4i)<sup>1</sup>: White solid;  $^1\text{H}$

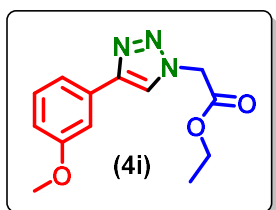

NMR (400 MHz,  $\text{CDCl}_3$ )  $\delta$  (ppm) = 7.91 (s, 1H), 7.47 (dd,  $J$  = 2.3 Hz, 1.6 Hz, 1H), 7.40-7.32 (m, 2H), 6.9 (m, 1H), 5.21 (s, 2H), 4.3 (q,  $J$  = 7.2 Hz, 2H), 3.88 (s, 3H), 1.32 (t,  $J$  = 7.1 Hz, 3H);  $^{13}\text{C}$  NMR (100 MHz,  $\text{CDCl}_3$ )  $\delta$  (ppm) = 166.23, 160.03, 148.15, 131.64, 129.86, 121.09, 118.22, 114.43, 110.85, 62.48, 55.36, 50.96, 14.06; HRMS (ESI)  $m/z$  calcd. For  $[\text{M}+\text{H}]^+$ : 262.1186, found: 262.1185.

10. Ethyl 2-(4-(4-fluorophenyl)-1H-1,2,3-triazol-1-yl)acetate (4j)<sup>1</sup>: Yellow solid;  $^1\text{H}$  NMR (400 MHz,

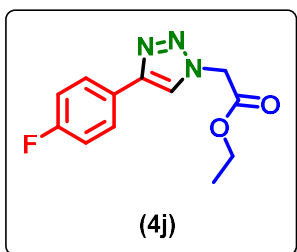

$\text{CDCl}_3$ )  $\delta$  (ppm) = 7.88 (s, 1H), 7.83 (dd,  $J$  = 8.9 Hz, 5.3 Hz, 2H), 7.13 (t,  $J$  = 8.8 Hz, 2H), 5.21 (s, 2H), 4.31 (q,  $J$  = 7.2 Hz, 2H), 1.33 (t,  $J$  = 7.1 Hz, 3H);  $^{13}\text{C}$  NMR (100 MHz,  $\text{CDCl}_3$ )  $\delta$  (ppm) = 166.23, 161.52, 147.43, 127.60, 127.52, 120.64, 115.95, 115.73, 62.53, 50.96, 14.08; HRMS (ESI)  $m/z$  calcd. For  $[\text{M}+\text{H}]^+$ : 250.0986, found: 250.0981.

11. Ethyl 2-(4-([1,1'-biphenyl]-4-yl)-1H-1,2,3-triazol-1-yl)acetate (4k)<sup>1</sup>: White solid;

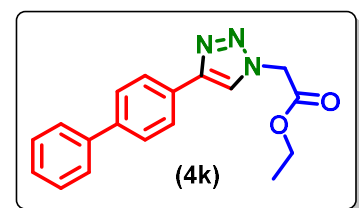

$^1\text{H}$  NMR (400 MHz,  $\text{CDCl}_3$ )  $\delta$  (ppm) = 7.96-7.92 (m, 3H), 7.70-7.64 (m, 4H), 7.47 (t,  $J$  = 7.6 Hz, 2H), 5.23 (s, 2H), 4.31 (q,  $J$  = 7.1 Hz, 2H), 1.33 (t,  $J$  = 7.1 Hz, 3H);  $^{13}\text{C}$  NMR (100 MHz,

$\text{CDCl}_3$ )  $\delta$  (ppm) = 166.25, 147.96, 141.03, 128.80, 127.52, 126.98, 126.19, 120.92, 62.49, 50.97, 14.07; HRMS (ESI)  $m/z$  calcd. For  $[\text{M}+\text{H}]^+$ : 308.1394, found: 308.1392.

12. **Methyl 4-(1-(2-ethoxy-2-oxoethyl)-1H-1,2,3-triazol-4-yl)benzoate (4l)**<sup>1</sup>: White solid;  $^1\text{H}$  NMR (400 MHz,  $\text{CDCl}_3$ )  $\delta$  (ppm) = 8.13 (d,  $J$  = 8.4 Hz, 2H), 8.02 (s, 1H),

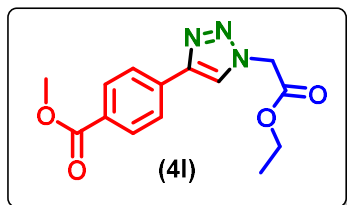

7.94 (d,  $J$  = 8.4 Hz, 2H), 5.24 (s, 2H), 4.31 (q,  $J$  = 7.1 Hz, 2H), 3.95 (s, 3H), 1.34 (t,  $J$  = 7.2 Hz, 3H);  $^{13}\text{C}$  NMR (100 MHz,  $\text{CDCl}_3$ )  $\delta$  (ppm) = 166.23, 166.12, 147.23, 134.63, 132.44, 130.20, 129.54, 121.79, 62.57,

52.33, 50.97, 14.05; HRMS (ESI)  $m/z$  calcd. For  $[\text{M}+\text{H}]^+$ : 290.1135, found: 290.1134.

13. **Ethyl 2-(4-octyl-1H-1,2,3-triazol-1-yl)acetate (4m)**: Yellow oil;  $^1\text{H}$  NMR (400

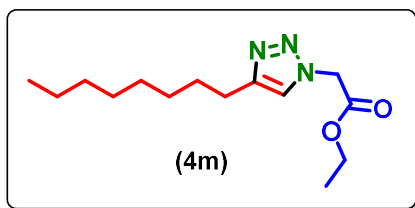

MHz,  $\text{CDCl}_3$ )  $\delta$  (ppm) = 7.41 (s, 1H), 5.13 (s, 2H), 4.27 (q,  $J$  = 7.1 Hz, 2H), 2.74 (t,  $J$  = 7.8 Hz, 2H), 1.73-1.65 (m, 2H), 1.34-1.25 (m, 13H), 0.88 (m, 3H);  $^{13}\text{C}$  NMR (100 MHz,

$\text{CDCl}_3$ )  $\delta$  (ppm) = 166.48, 148.97, 121.87, 62.30, 50.77, 31.84, 30.92, 29.68, 29.32, 29.21, 29.20.

14. **Ethyl 2-(4-hexyl-1H-1,2,3-triazol-1-yl)acetate**: Yellow oil;  $^1\text{H}$  NMR (400 MHz,  $\text{CDCl}_3$ )

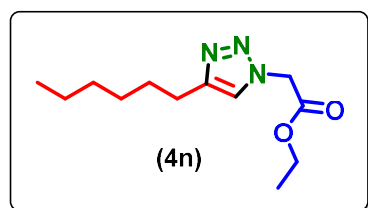

$\delta$  (ppm) = 7.41 (s, 1H), 5.12 (s, 2H), 4.27 (q,  $J$  = 7.1 Hz, 2H), 2.74 (t,  $J$  = 7.7 Hz, 2H), 1.73-1.64 (m, 2H),

1.34-1.26 (m, 9H), 0.91-0.89 (m, 3H);  $^{13}\text{C}$  NMR (100 MHz,  $\text{CDCl}_3$ )  $\delta$  (ppm) = 166.48, 148.96, 121.87, 62.30, 50.77, 31.55, 29.28, 28.87, 25.65, 22.54, 14.05.

15. Ethyl 2-(4-(m-tolyl)-1H-1,2,3-triazol-1-

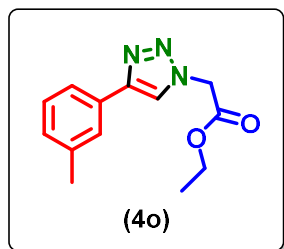

yl)acetate: Yellow oil;  $^1\text{H}$  NMR (400 MHz,  $\text{CDCl}_3$ )  $\delta$  (ppm) = 7.9 (s, 1H), 7.71 (s, 1H), 7.62 (d,  $J = 7.6$  Hz, 1H), 7.32 (t,  $J = 7.7$  Hz, 1H), 7.16 (d,  $J = 7.5$  Hz, 1H), 5.2 (s, 2H), 4.29 (q,  $J = 7.2$  Hz, 2H), 2.41 (s, 3H), 1.31 (t,  $J = 7.1$

Hz, 3H);  $^{13}\text{C}$  NMR (100 MHz,  $\text{CDCl}_3$ )  $\delta$  (ppm) = 166.48, 148.96, 121.87, 62.30, 50.77, 31.55, 29.28, 28.87, 25.65, 22.54, 14.05.

4. References:

1. Y. Lv, Z. Wang, L. Song, J. Hao, S. Zhu, H. Yue, W. Wei and D. Yi, *J. Org. Chem.*, 2023, **88**, 17266–17273.
-

5.  $^1\text{H}$  and  $^{13}\text{C}$  NMR spectra:

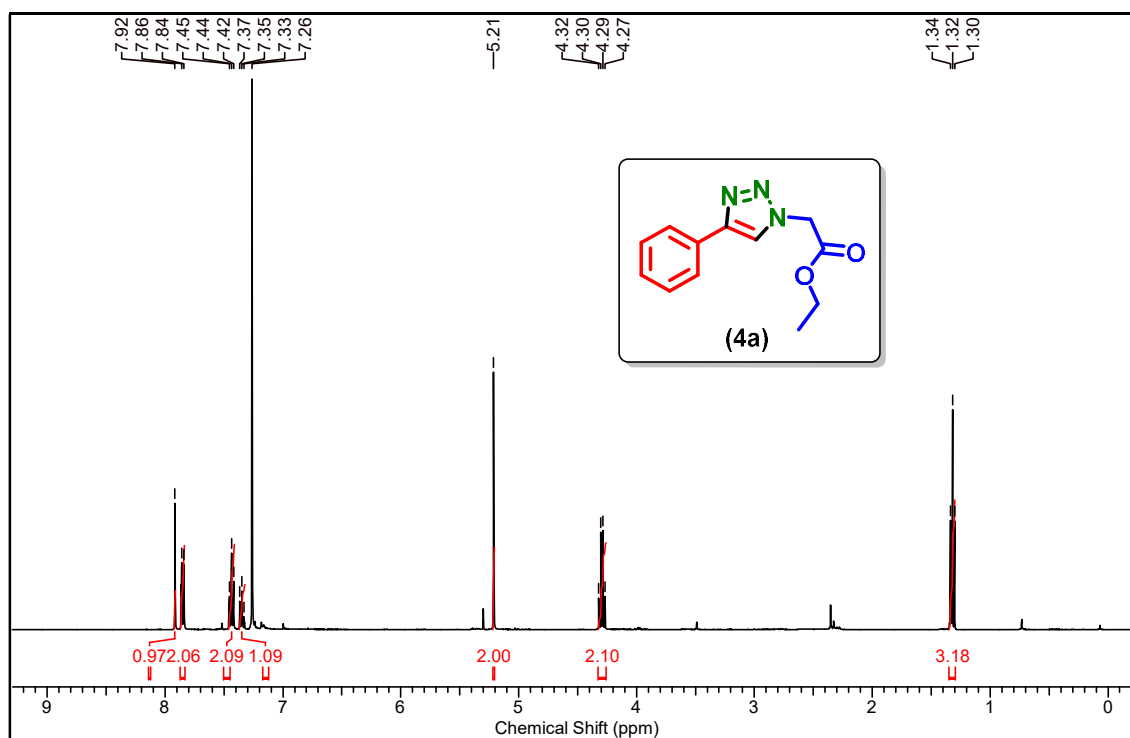

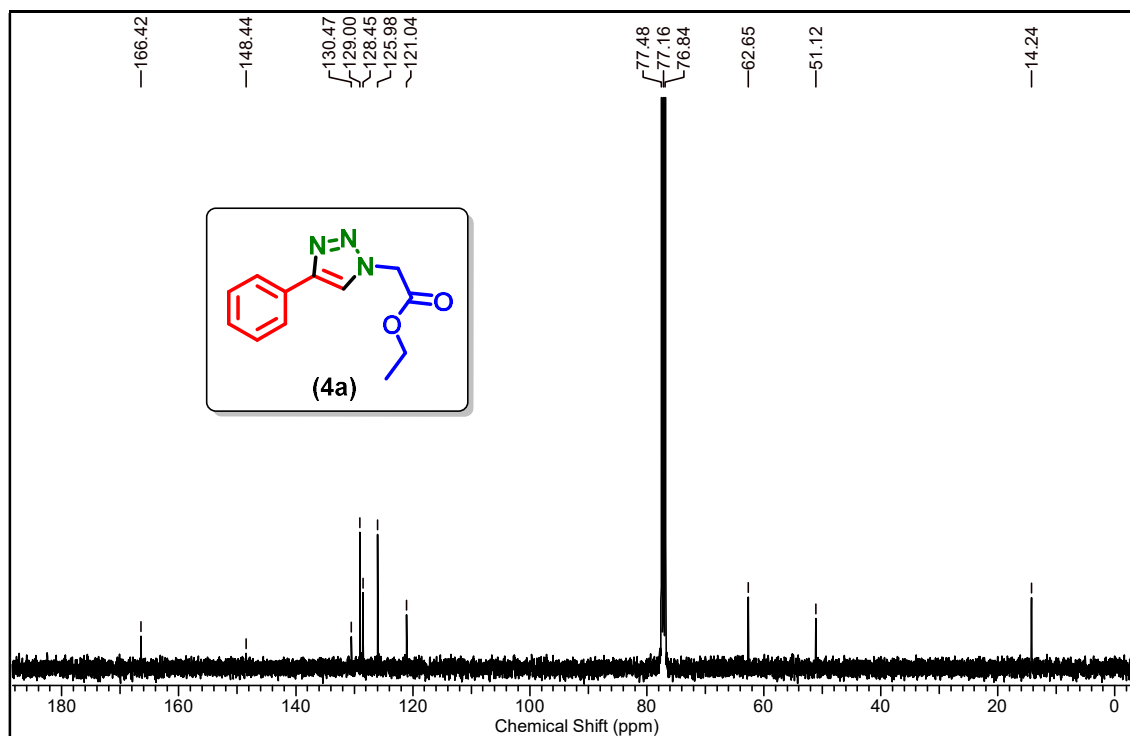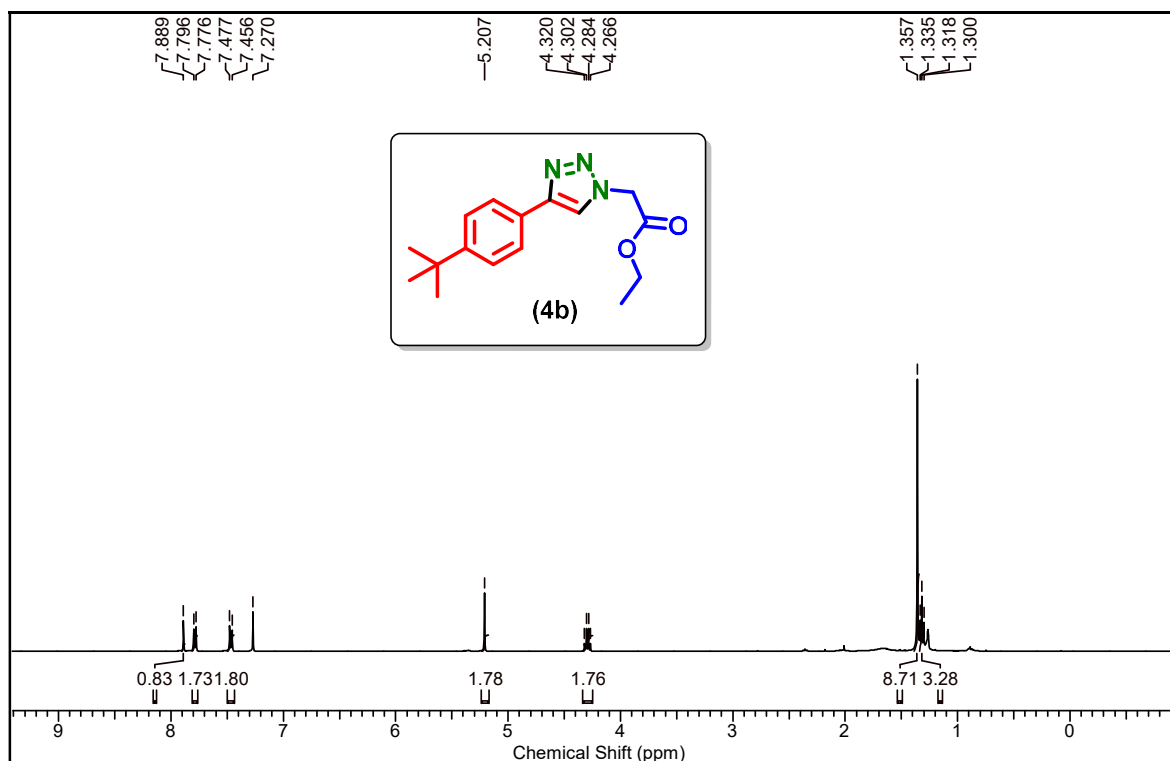

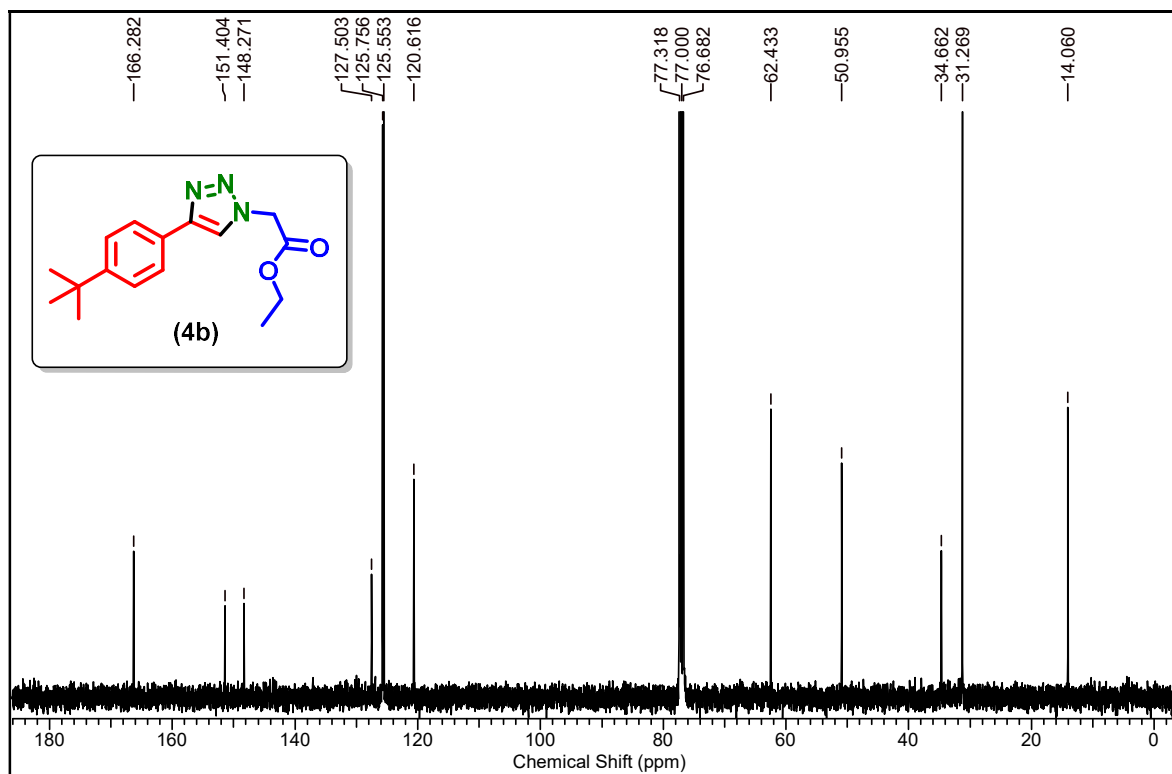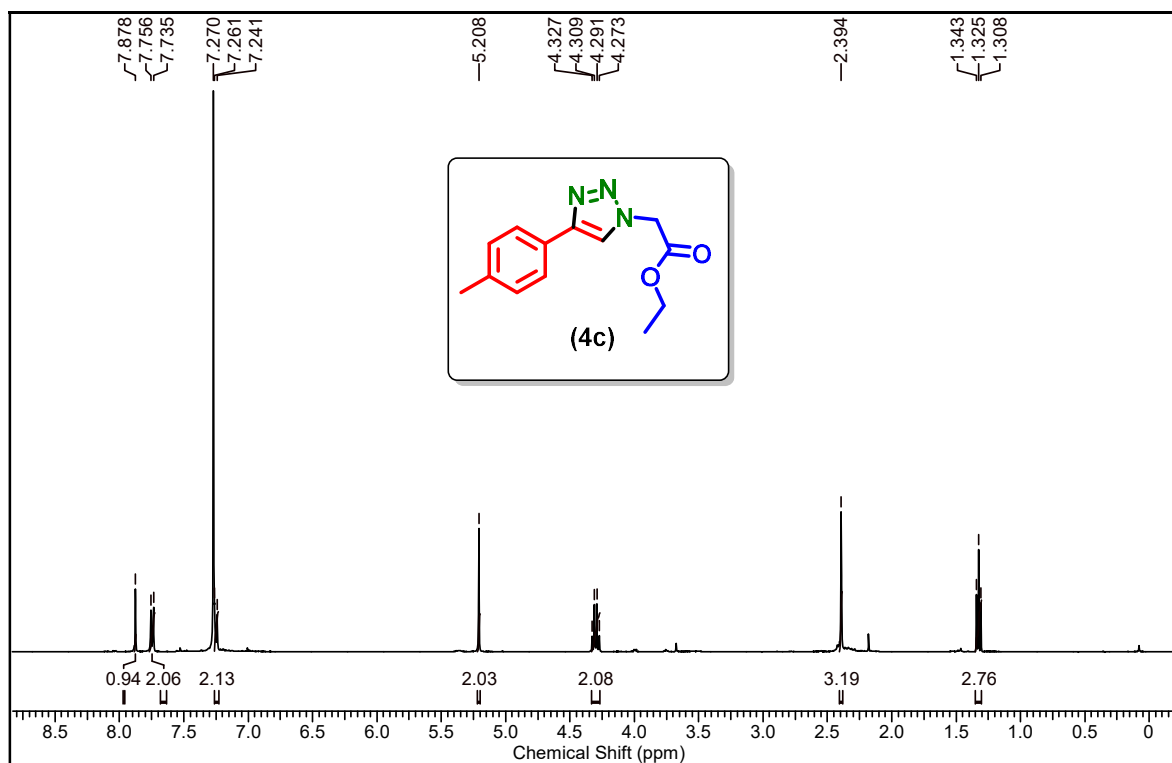

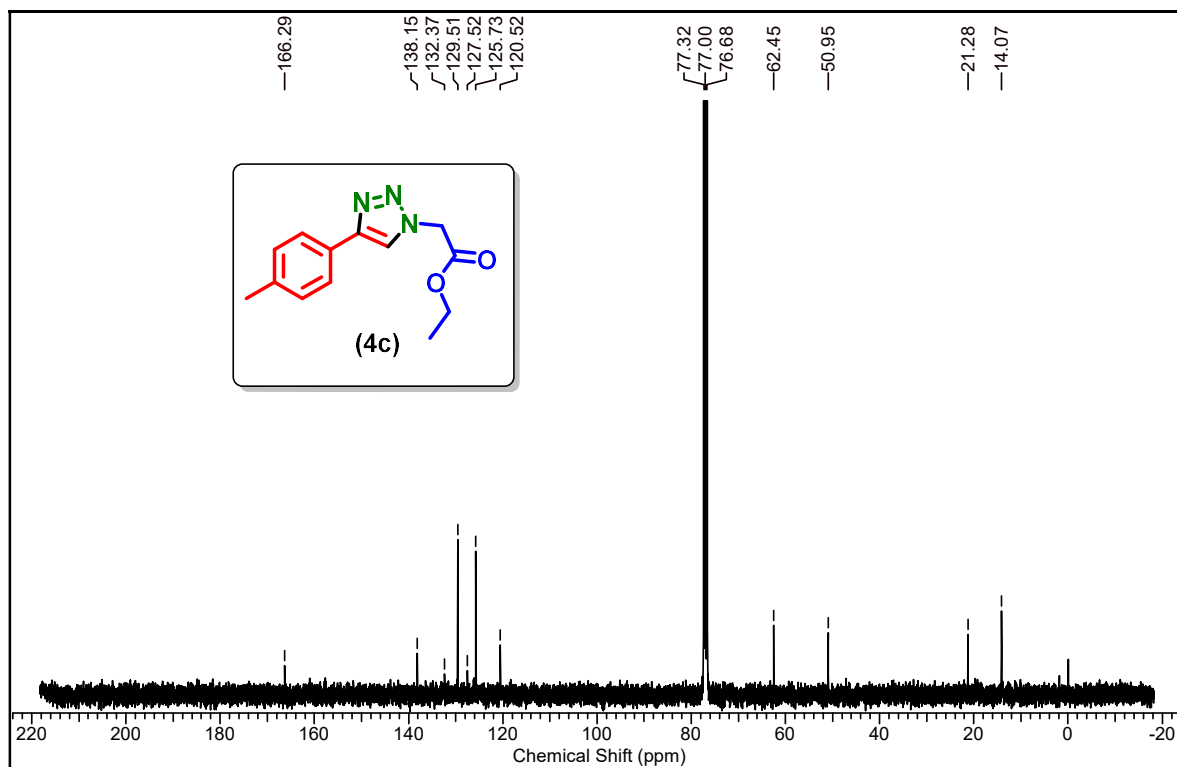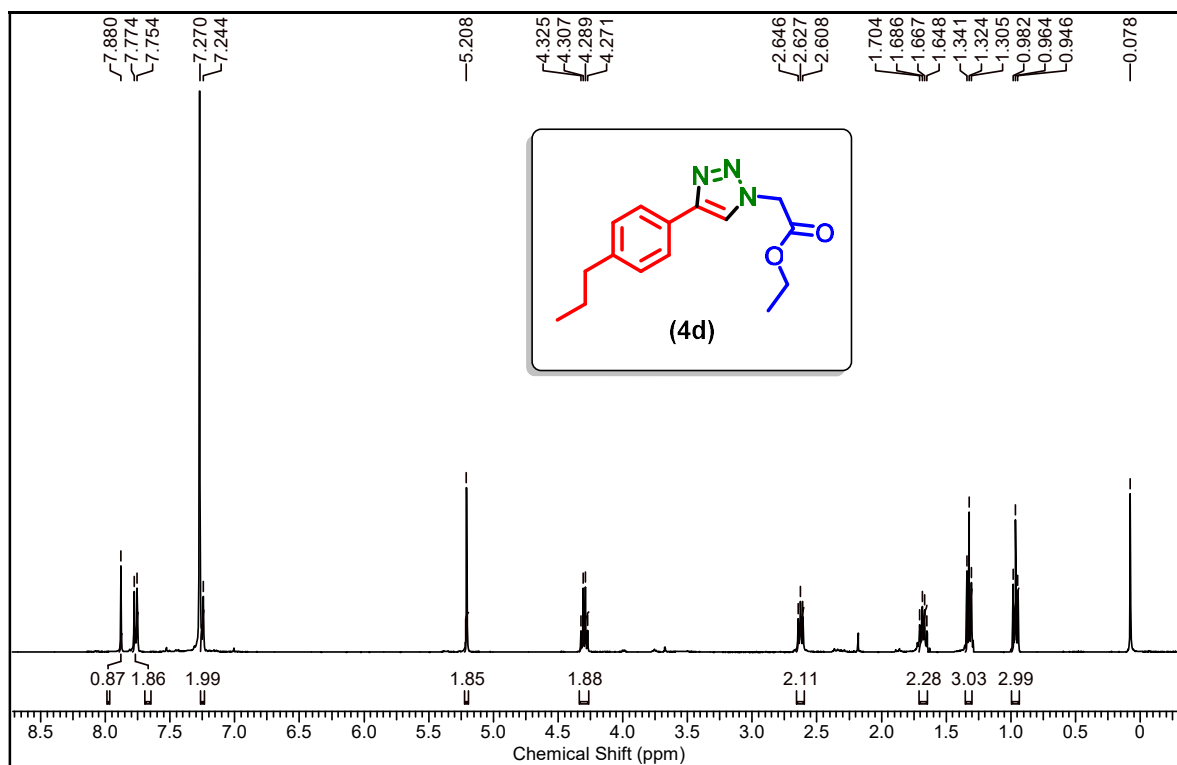

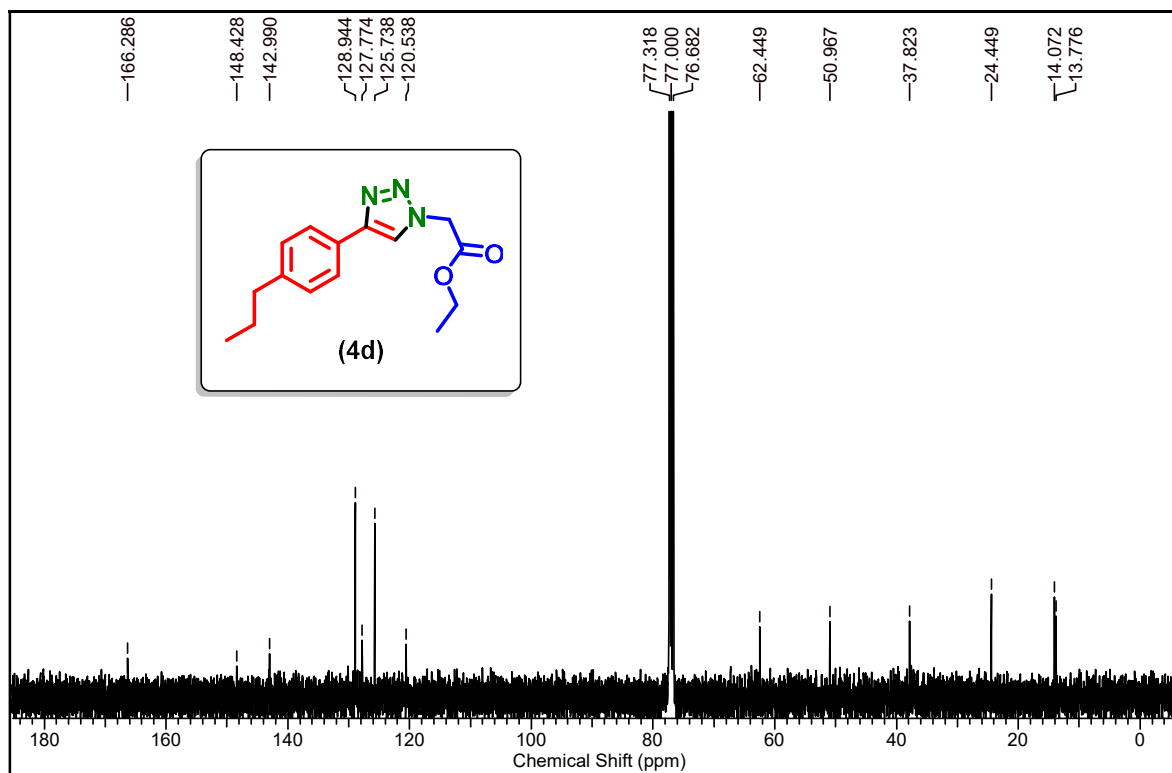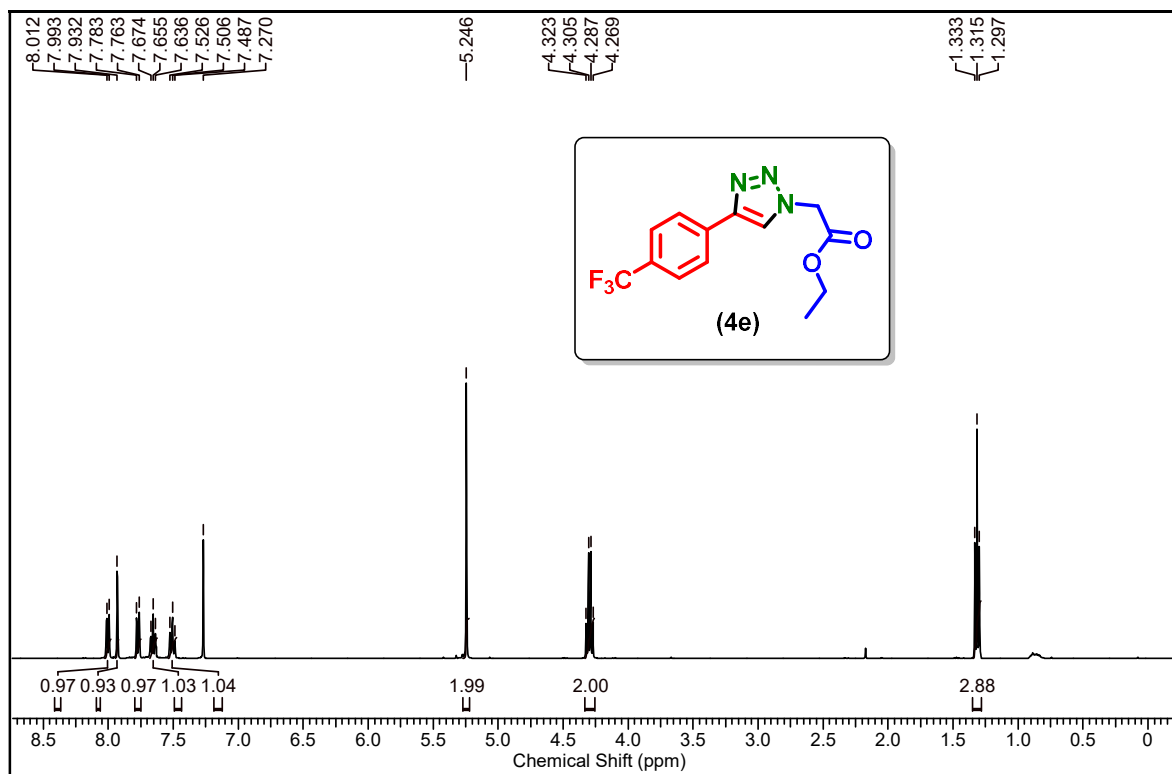

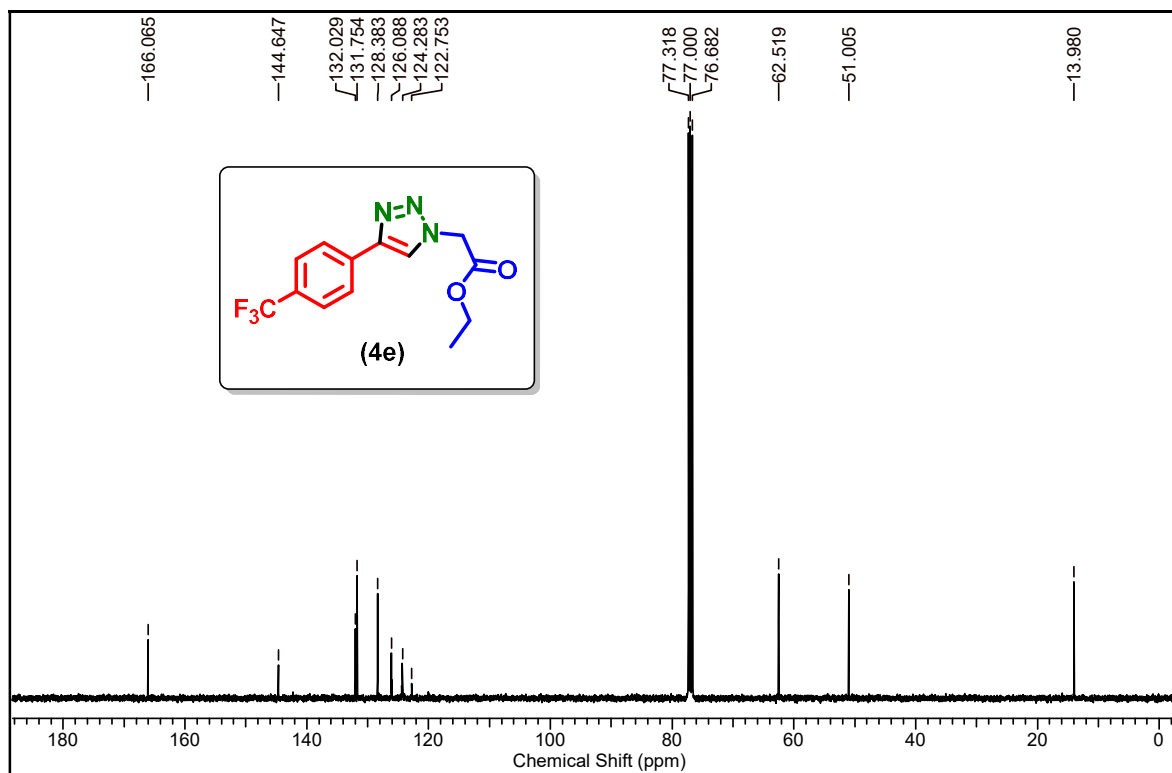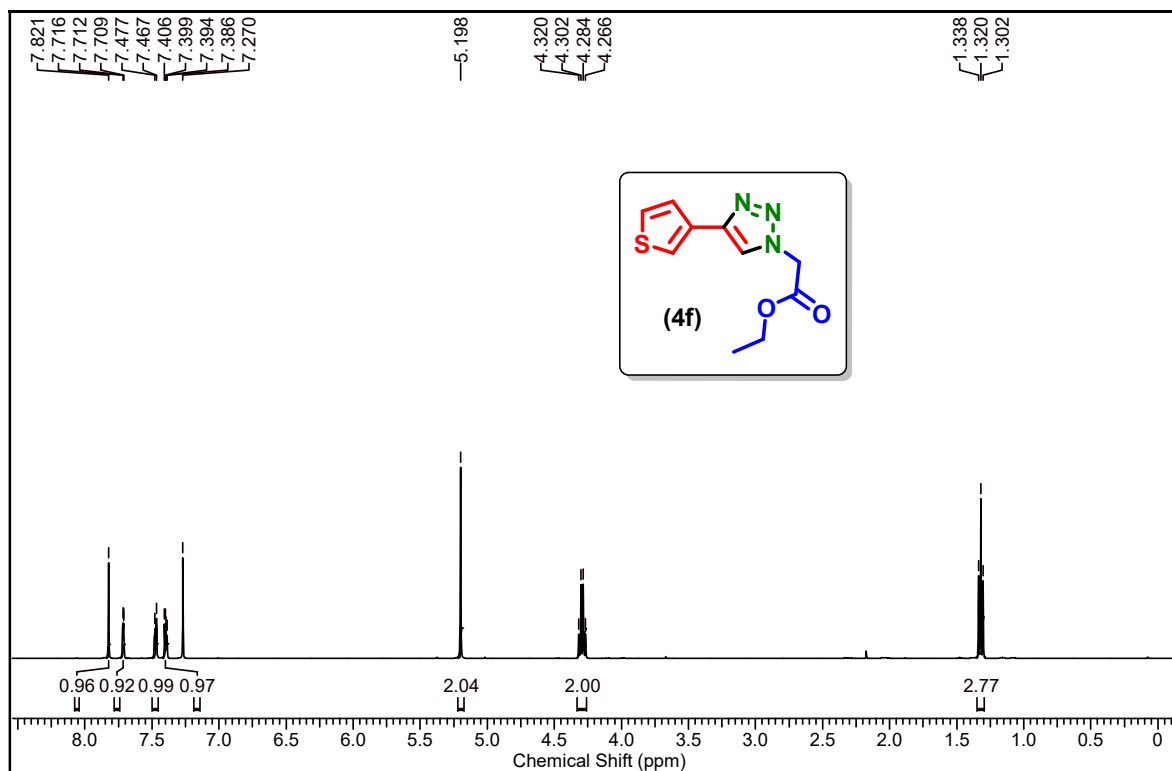

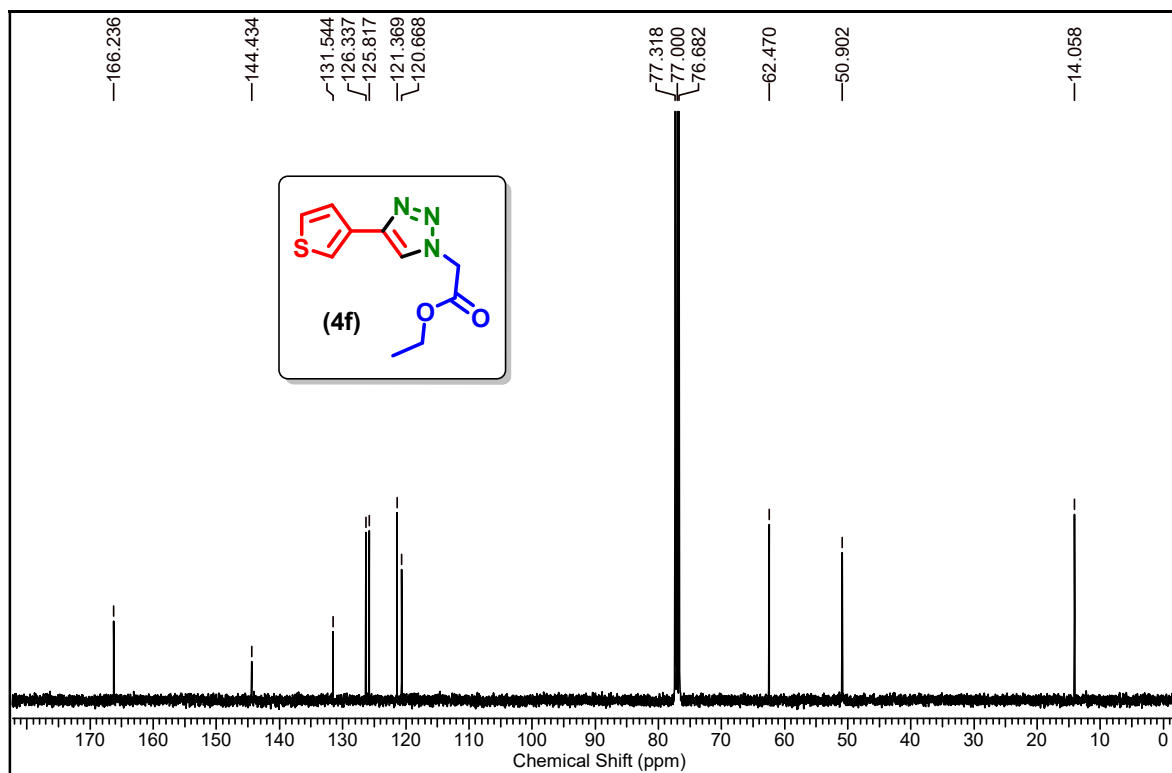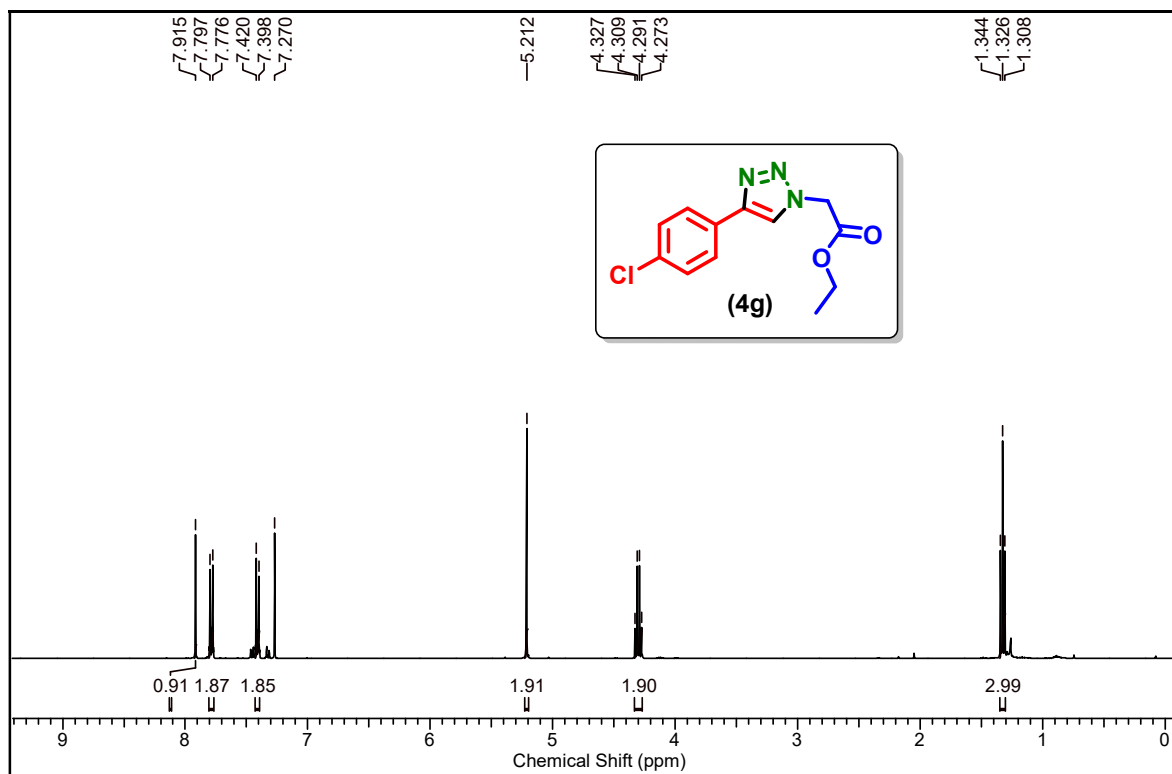

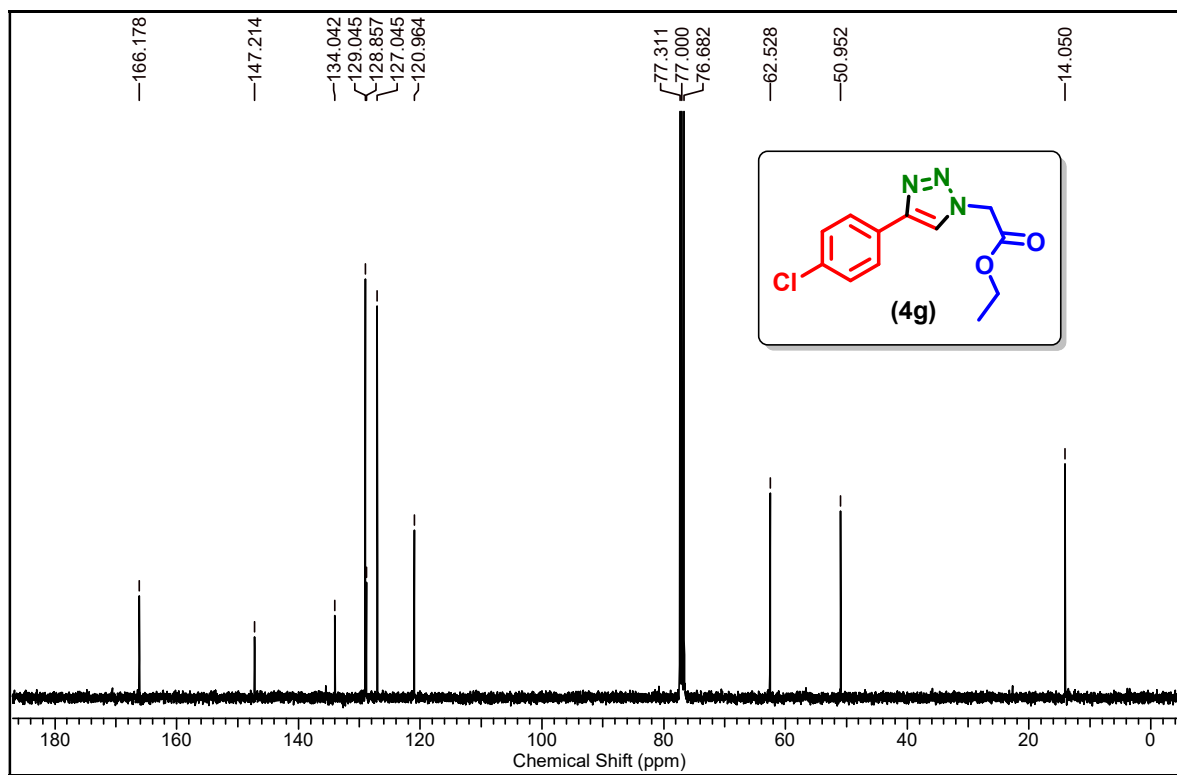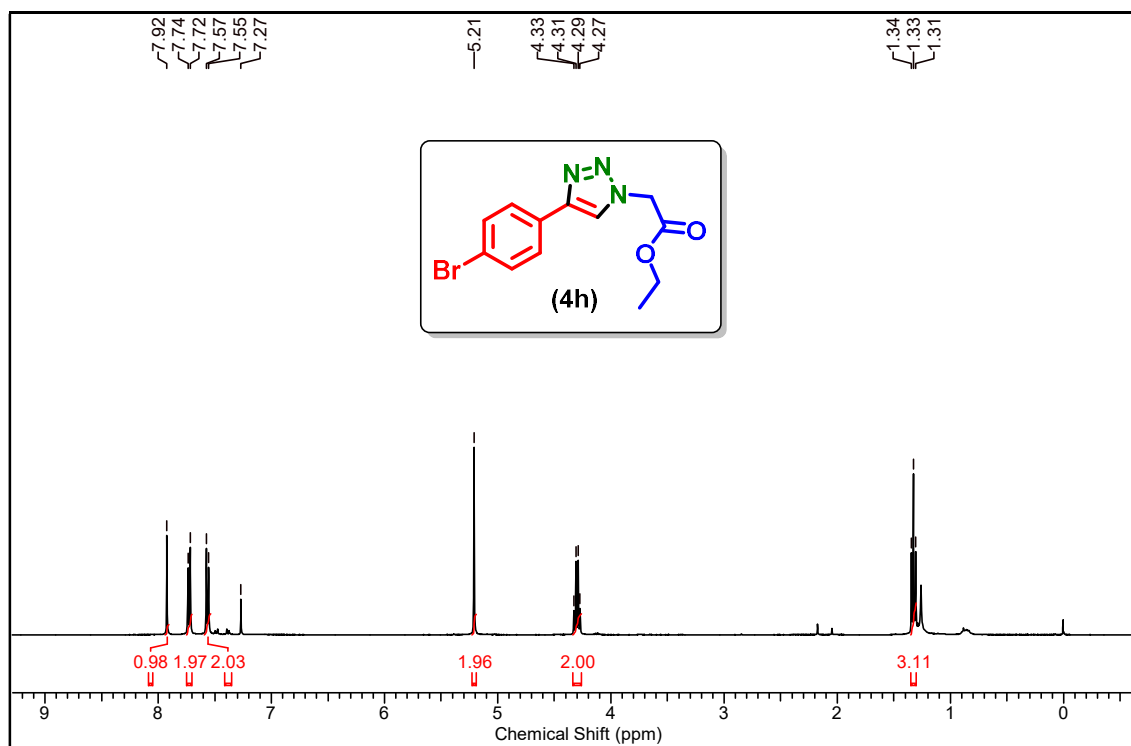

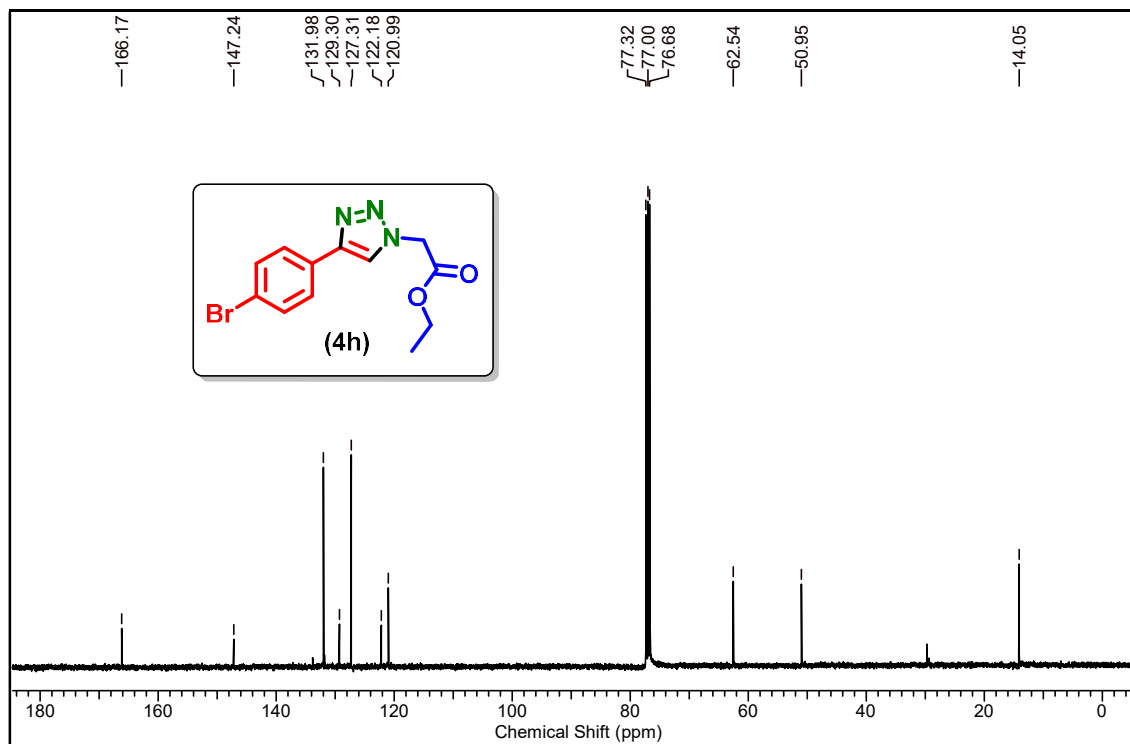

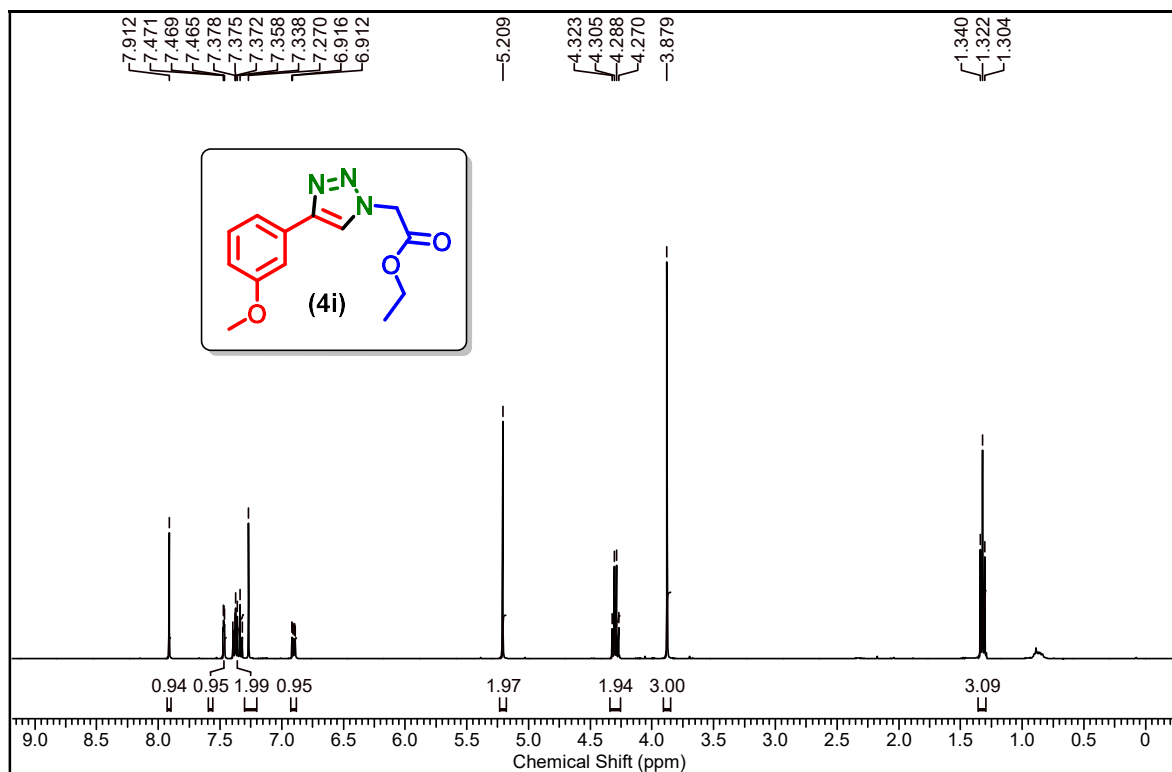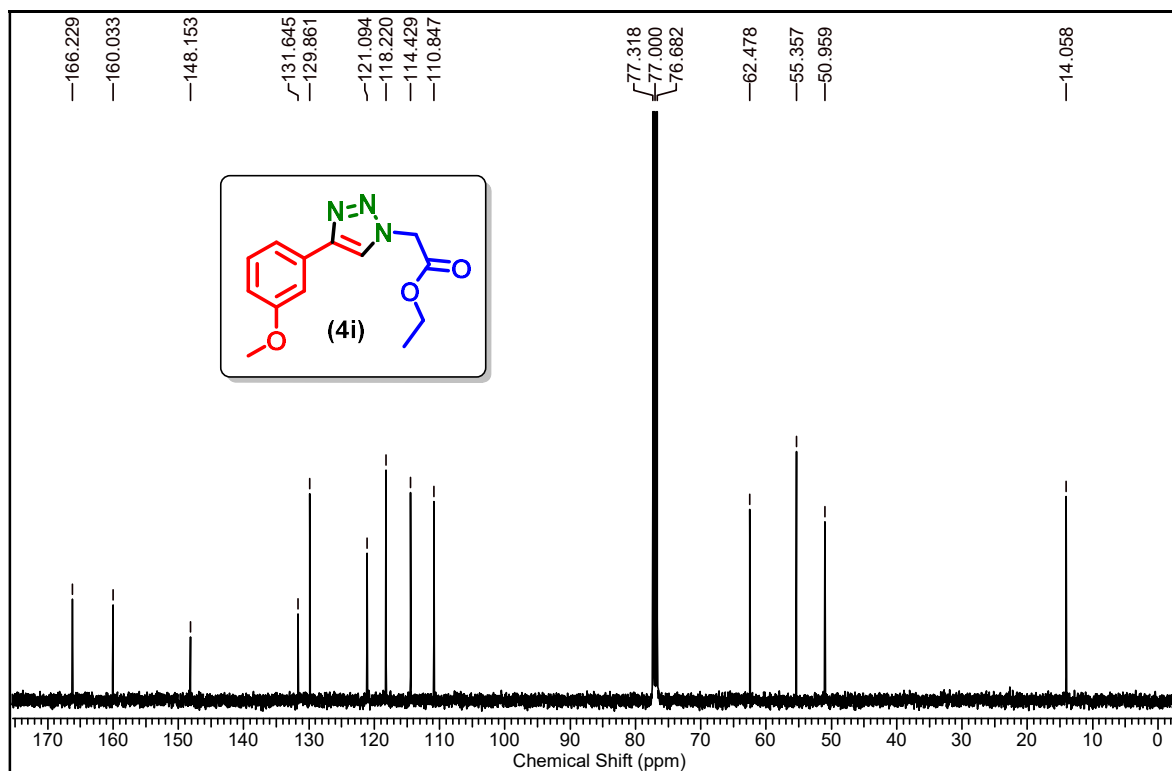

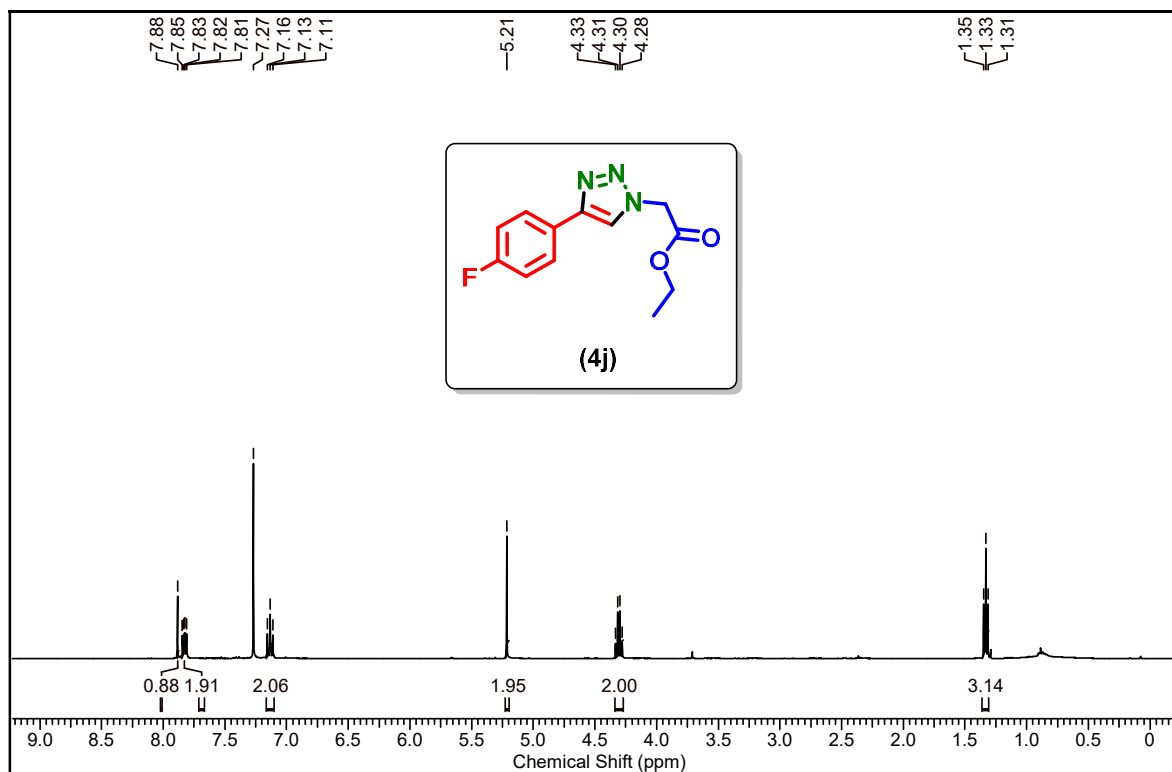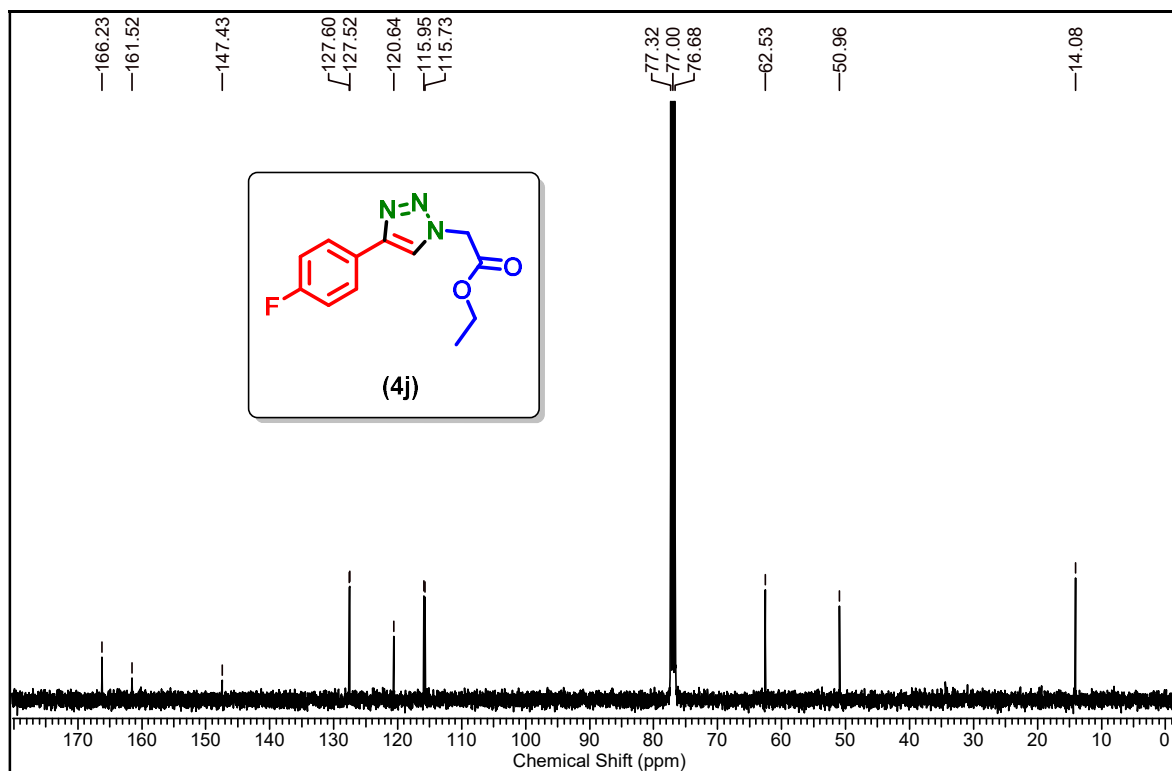

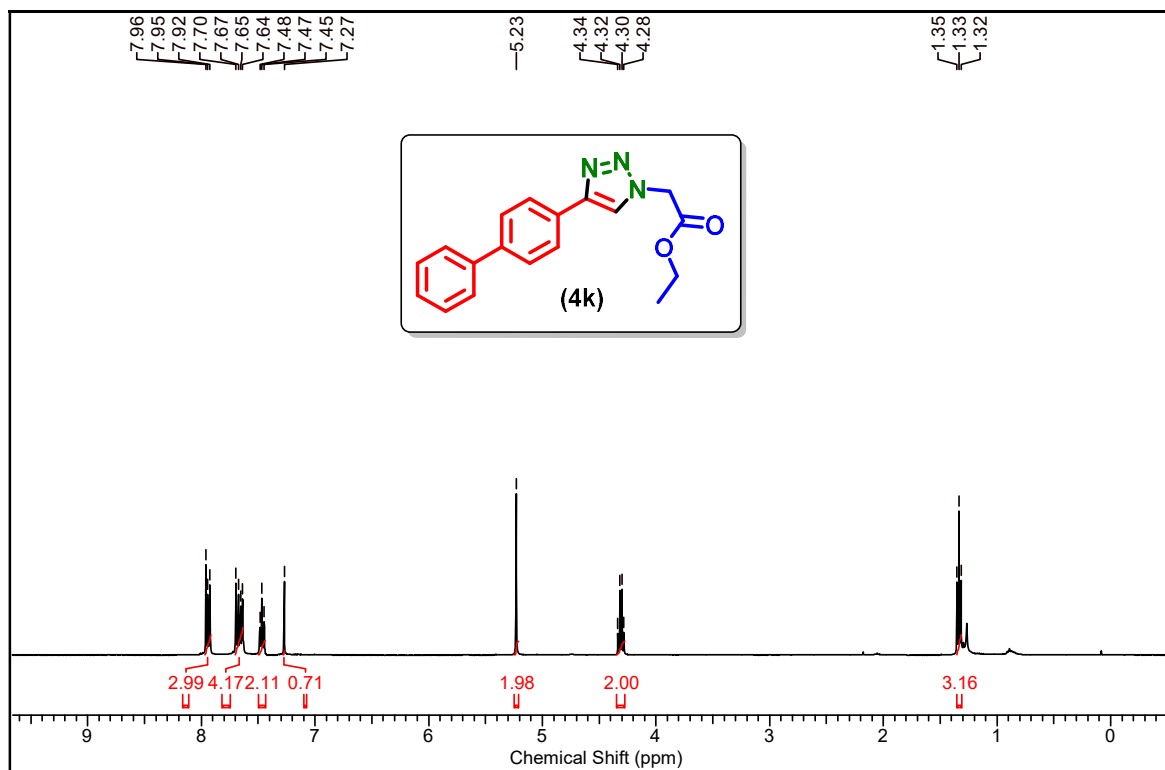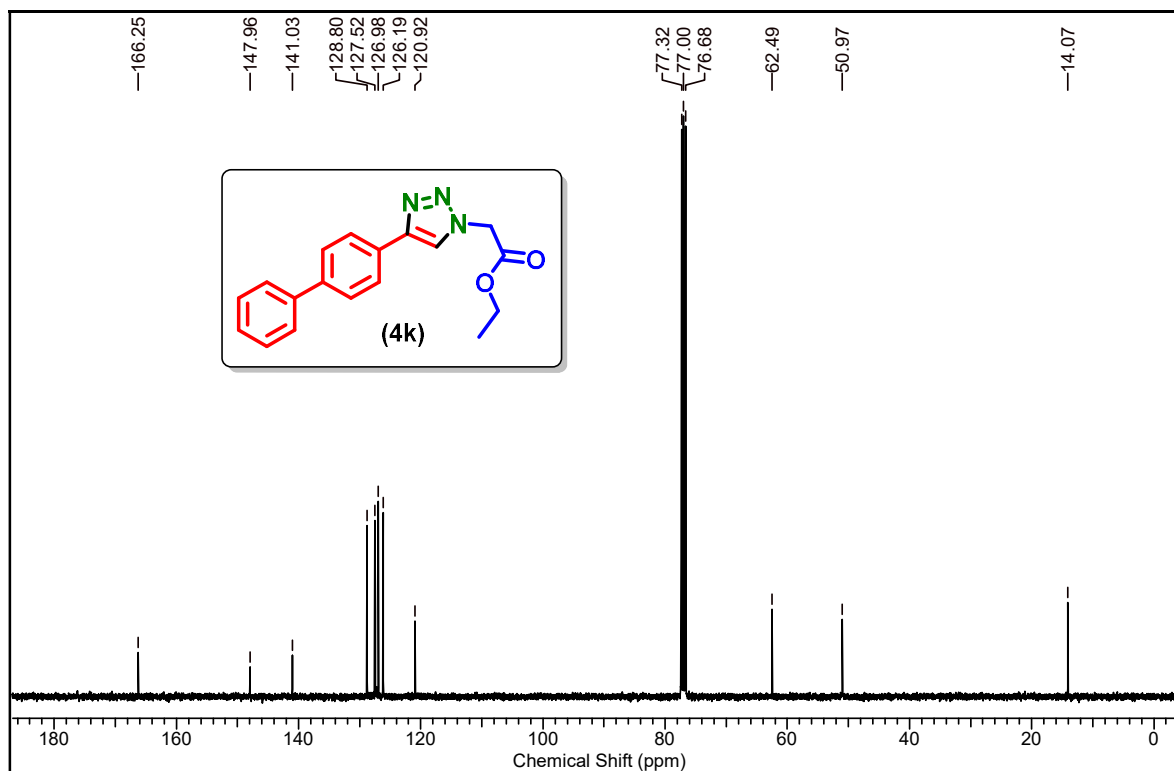

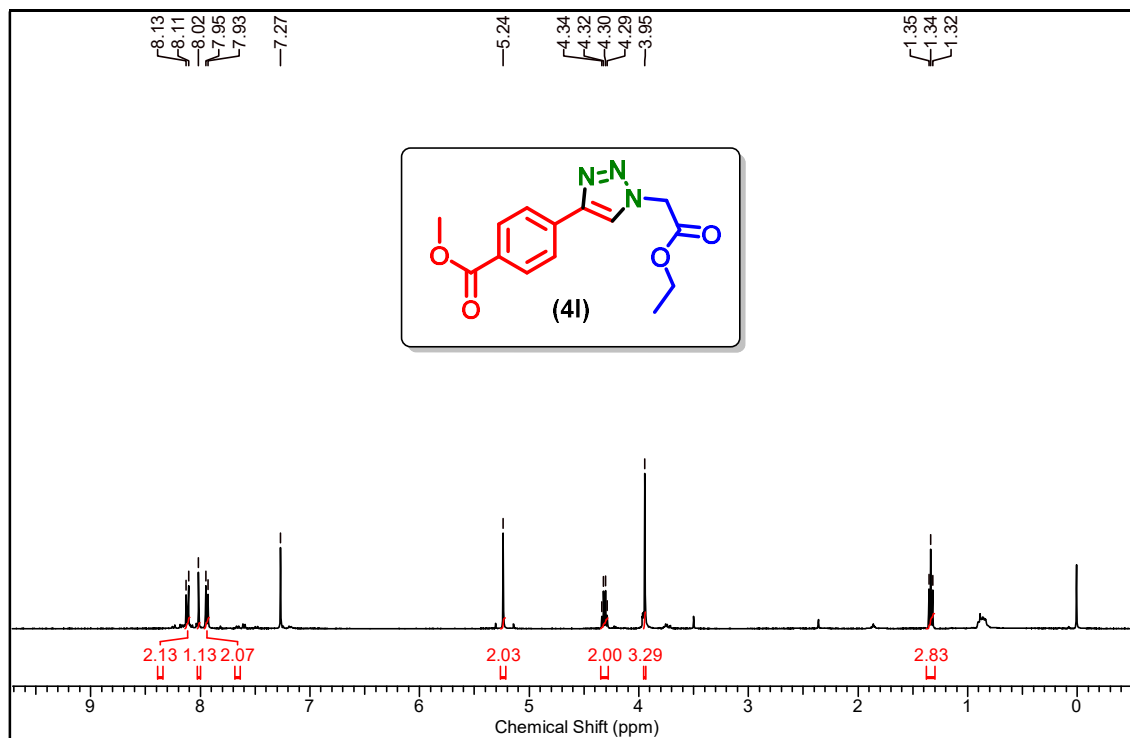

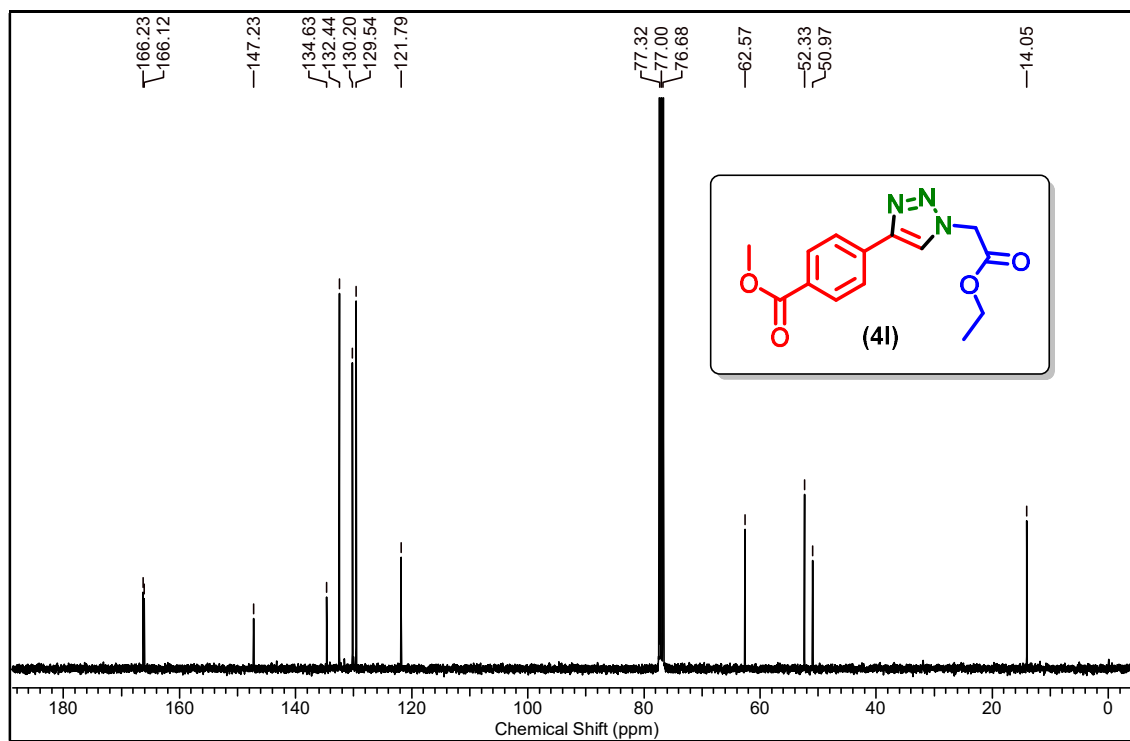

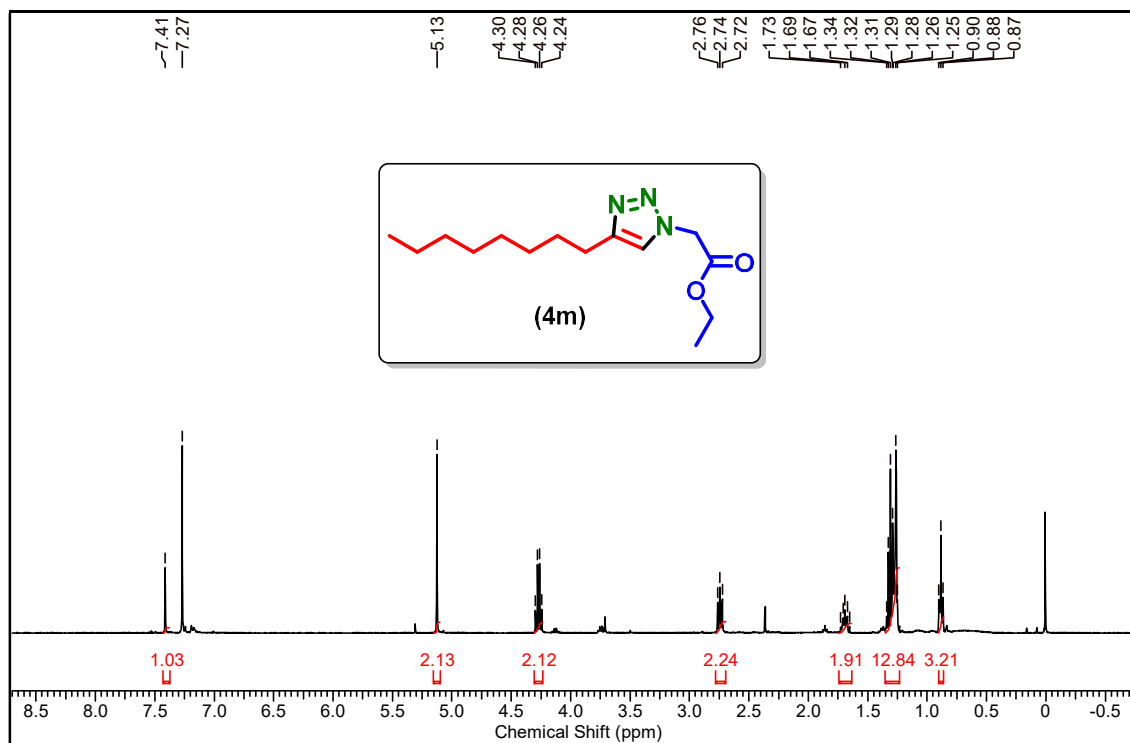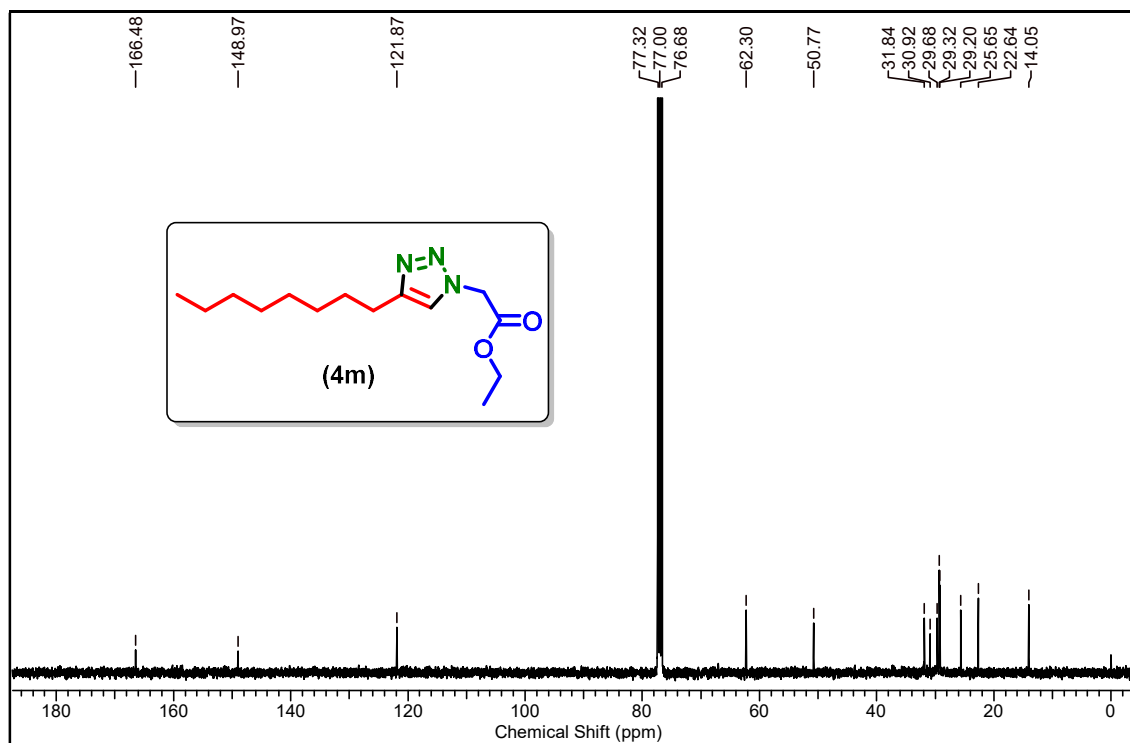

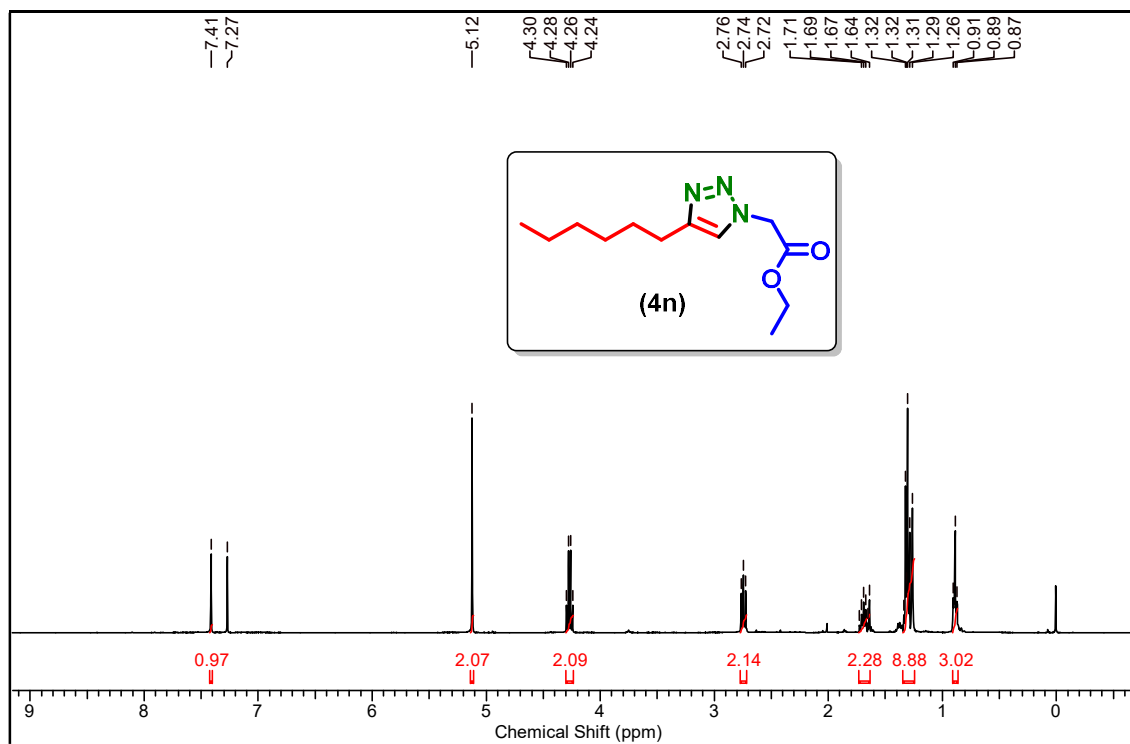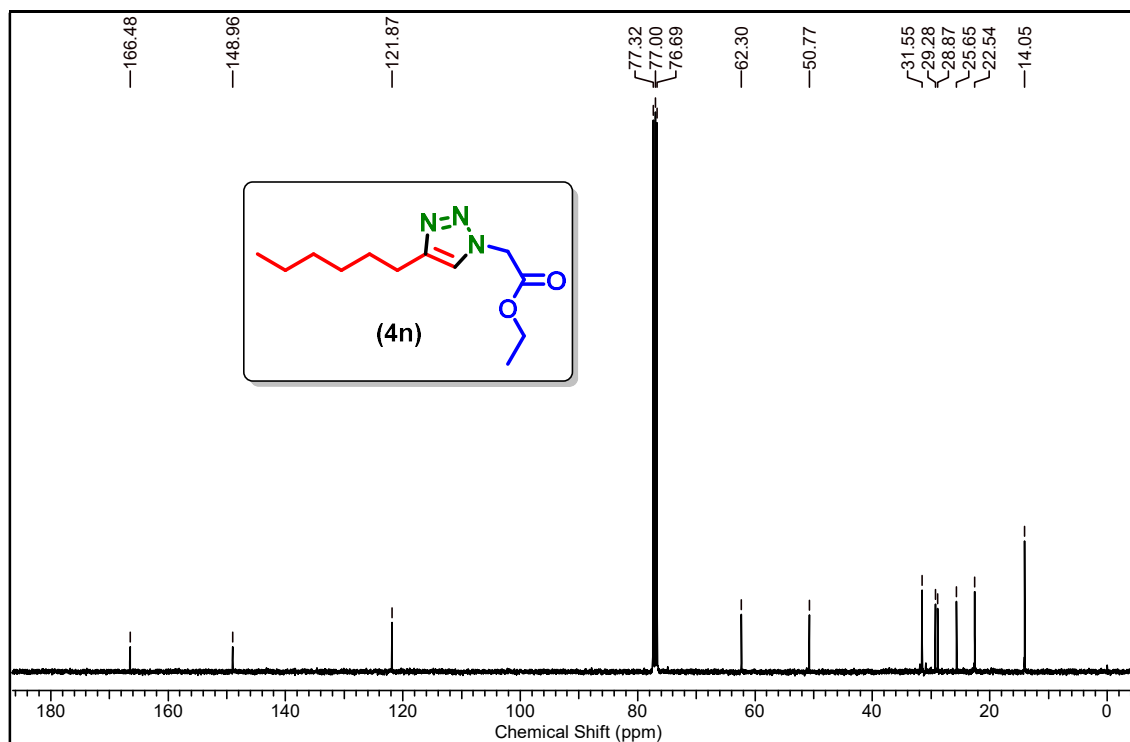

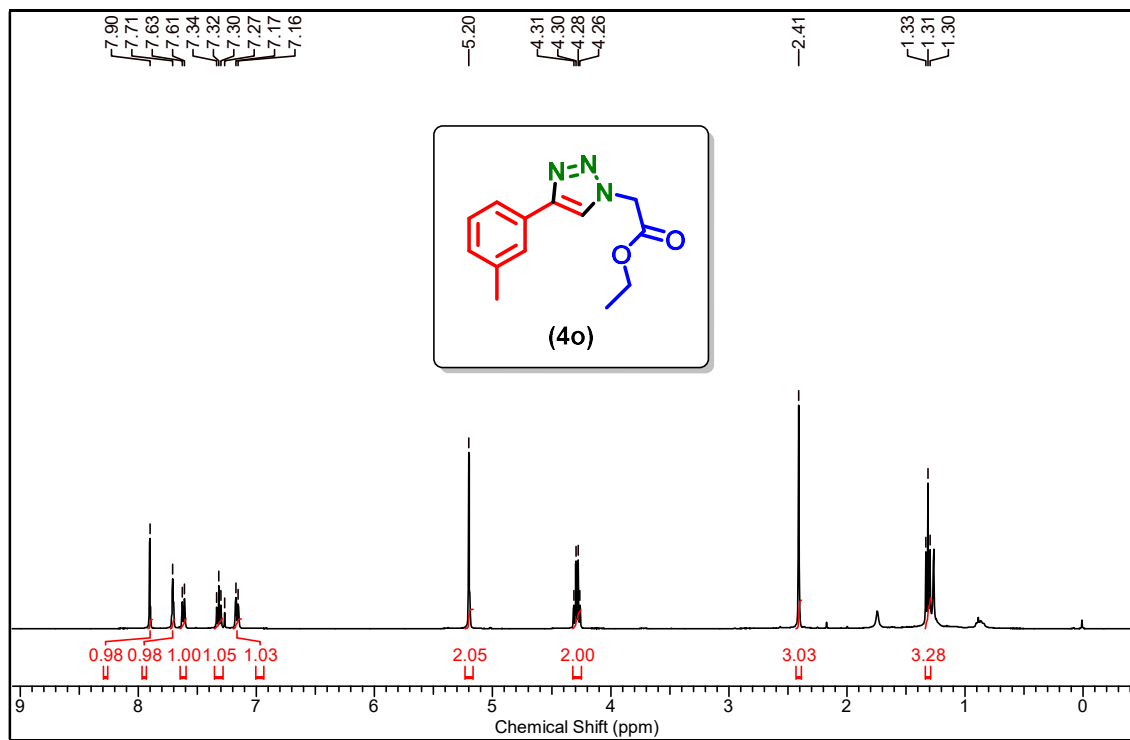

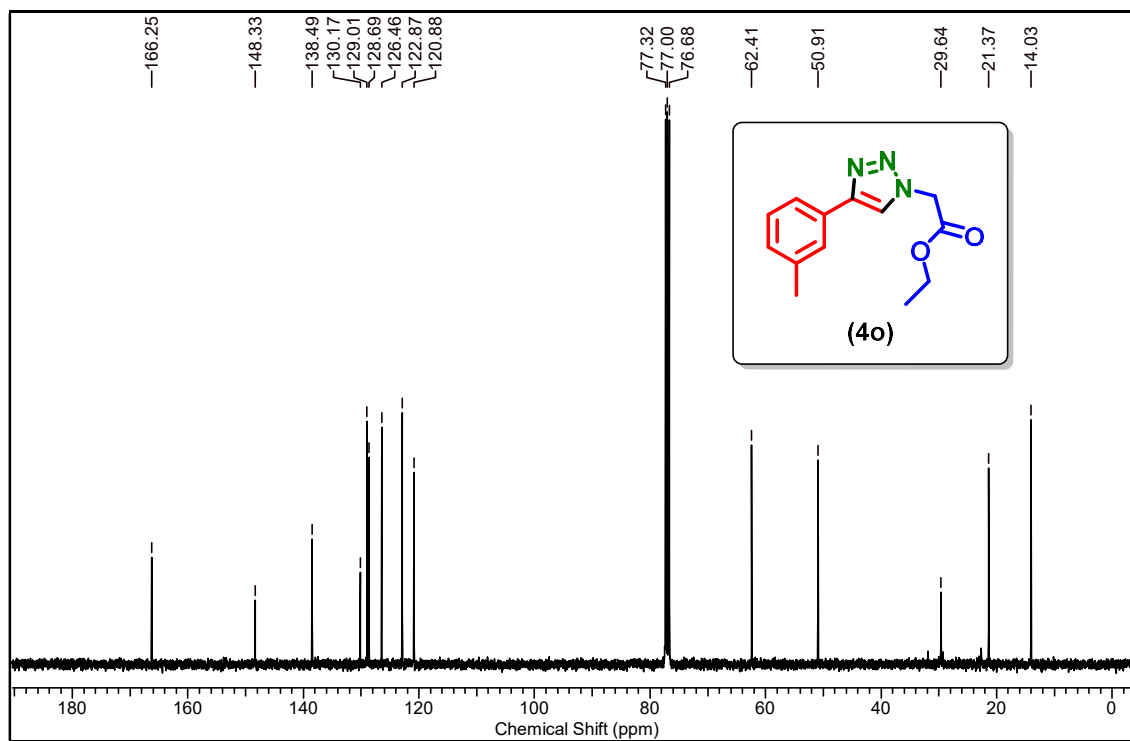

6. HRMS spectra:

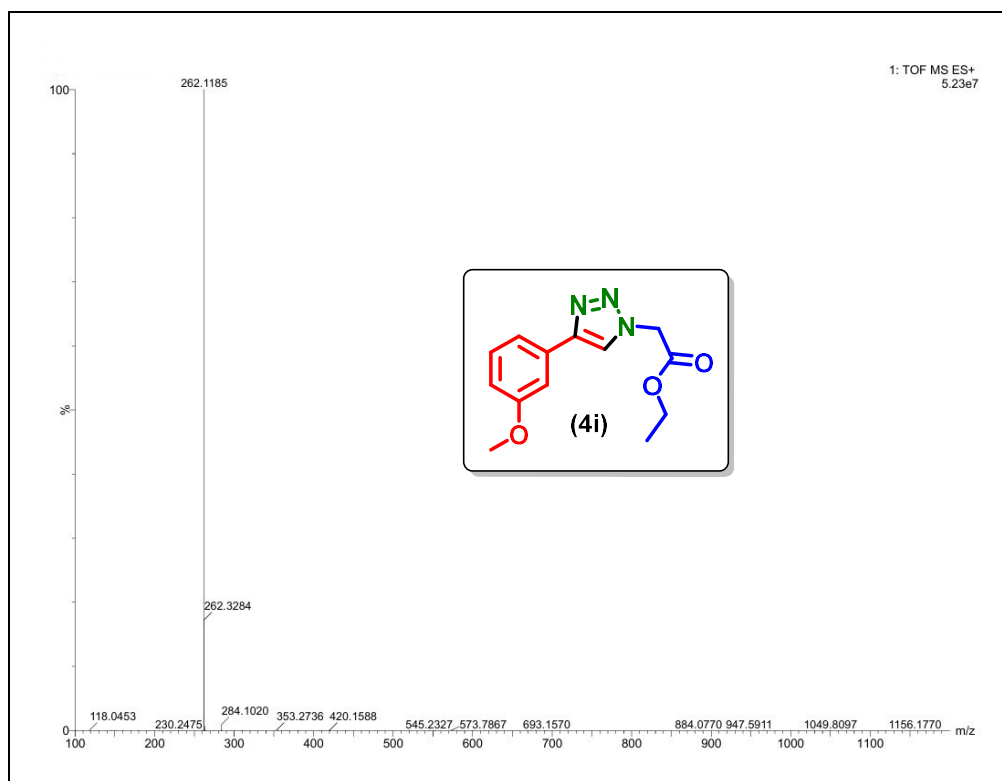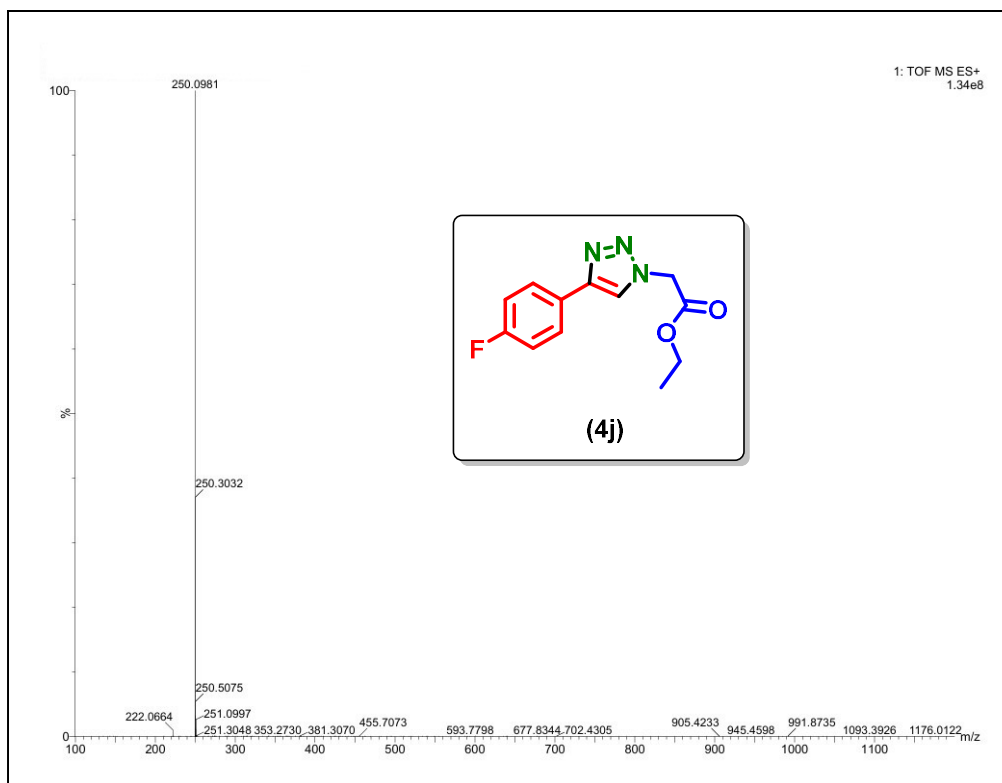

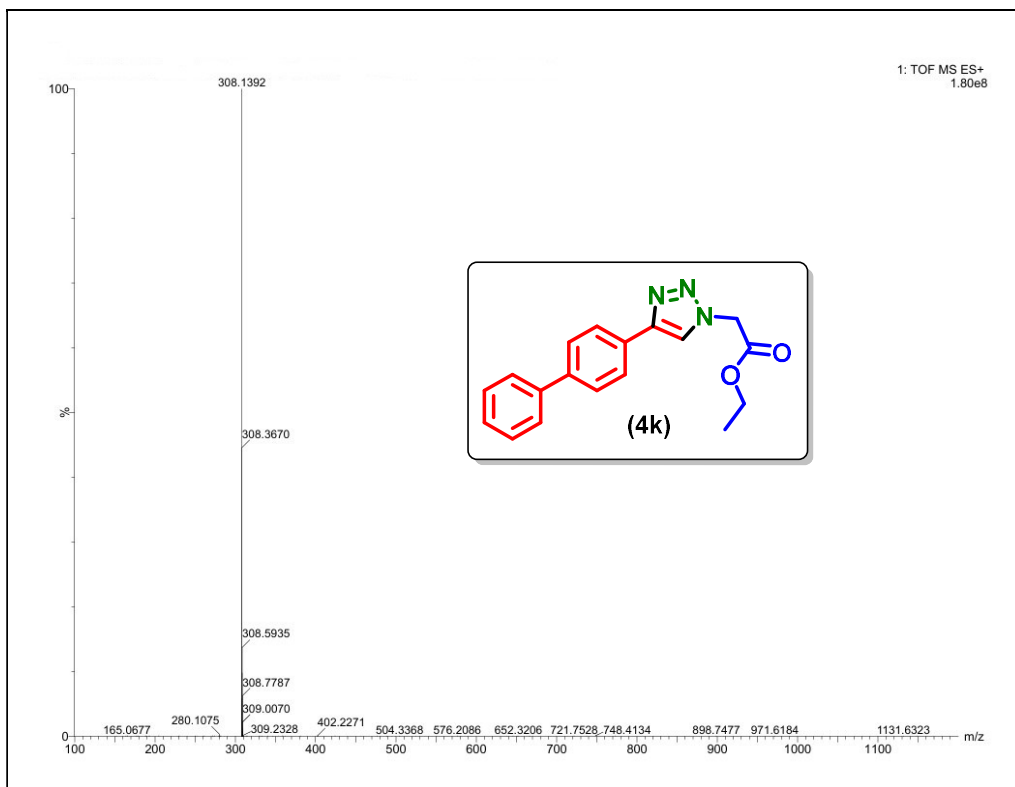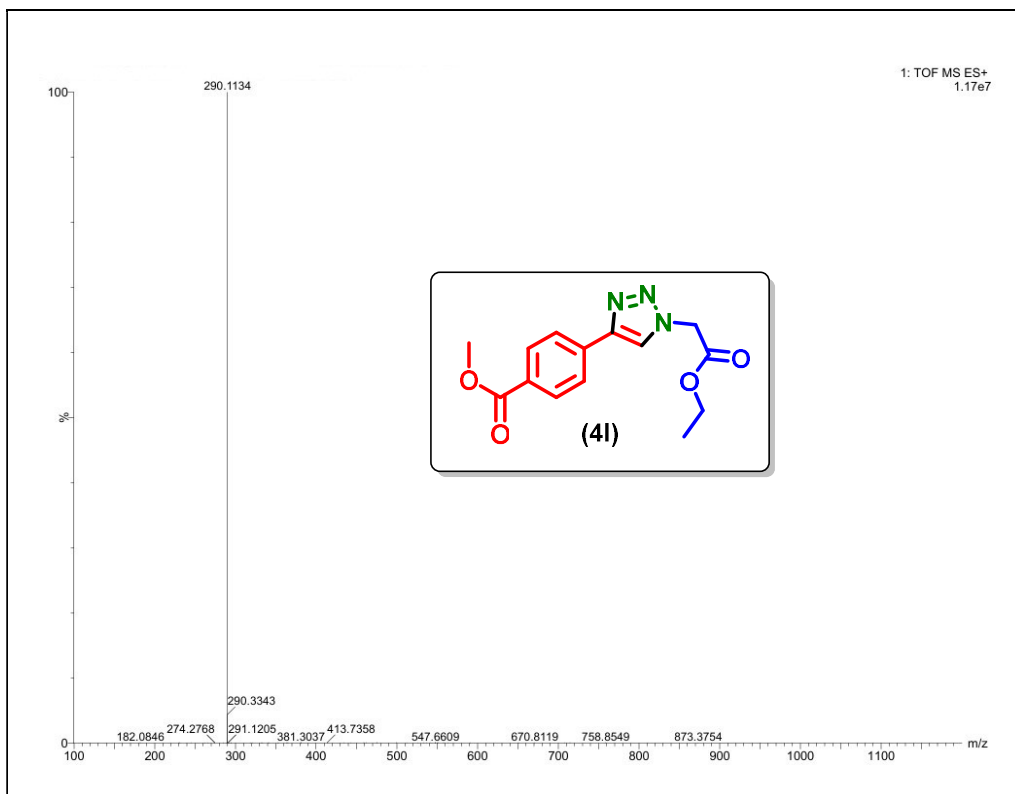

Supplement: d6cy00356g1.pdf [file d6cy00356g1.pdf]
